1 **Radially-patterned cell behaviours during tube budding from an**  
2 **epithelium**

3

4 Yara E. Sanchez-Corrales<sup>1</sup>, Guy B. Blanchard<sup>2\*</sup> and Katja Röper<sup>1\*</sup>

5

6

7

8

9

10 <sup>1</sup>MRC-Laboratory of Molecular Biology, Cambridge Biomedical Campus,

11 Francis Crick Avenue, Cambridge CB2 0QH, UK

12

13 <sup>2</sup>Dept. of Physiology, Development and Neuroscience, University of Cambridge,

14 Downing Street, Cambridge CB2 3DY, UK

15

16

17 \*Authors for correspondence, kroeper@mrc-lmb.cam.ac.uk, gb288@cam.ac.uk

18

19

20

21

22

23

1 **Abstract**

2 The budding of tubular organs from flat epithelial sheets is a vital morphogenetic  
3 process. Cell behaviours that drive such processes are only starting to be unraveled.  
4 Using live imaging and novel morphometric methods we show that in addition to  
5 apical constriction, radially oriented directional intercalation of placodal cells plays a  
6 major contribution to the early stages of invagination of the salivary gland tube in the  
7 *Drosophila* embryo. Extending analyses in 3D, we find that near the pit of  
8 invagination, isotropic apical constriction leads to strong cell wedging, and further  
9 from the pit cells interleave circumferentially, suggesting apically driven behaviours.  
10 Supporting this, junctional myosin is enriched in, and neighbour exchanges biased  
11 towards the circumferential orientation. In a mutant failing pit specification, neither  
12 are biased due to an inactive pit. Thus, tube budding depends on a radially polarised  
13 pattern of apical myosin leading to radially oriented 3D cell behaviours, with a close  
14 mechanical interplay between invagination and intercalation.

15

## 1 **Introduction**

2 During early embryonic development, simple tissue structures are converted into  
3 complex organs through highly orchestrated morphogenetic movements. The last  
4 decade has brought a lot of understanding of individual processes and some of the  
5 important molecular players. In particular, the importance of actin together with  
6 myosin II as the major driver of cell shape changes and cell movement that underlie  
7 morphogenetic changes has been elucidated in more detail (Levayer and Lecuit,  
8 2012; Munjal and Lecuit, 2014).

9 We use the formation of a simple tubular epithelial structure from a flat  
10 epithelial sheet as a model system to dissect the processes and forces that drive this  
11 change. Many important organ systems in both vertebrates and invertebrates are  
12 tubular in structure, such as lung, kidney, vasculature, digestive system and many  
13 glands. The formation of the salivary glands from an epithelial placode in the  
14 *Drosophila* embryo constitutes such a simple model of tubulogenesis (Girdler and  
15 Röper, 2014; Sidor and Röper, 2016). Each of the two placodes on the ventral side of  
16 the embryo (Fig. 1A) consists of about 100 epithelial cells, and cells in the dorso-  
17 posterior corner of the placode begin the process of tube formation through  
18 constriction of their apical surfaces, leading to the formation of an invagination pit  
19 through which all cells eventually invaginate (Fig. 1B; Girdler and Röper, 2014; Sidor  
20 and Röper, 2016).

21 Apical constriction, a cell behaviour of epithelial cells that can transform  
22 columnar or cuboidal cells into wedge-shaped cells and can thereby induce and  
23 assist tissue bending, has emerged as a key morphogenetic module utilised in many  
24 different events ranging from mesoderm invagination in flies, *Xenopus* and zebrafish  
25 to lens formation in the mouse eye (Lee and Harland, 2007; Martin and Goldstein,  
26 2014; Martin et al., 2009; Plageman et al., 2011). Apical constriction relies on the  
27 apical accumulation of actomyosin, that when tied to junctional complexes can exert  
28 pulling forces on the cell cortex and thereby reduce apical cell radius (Blanchard et

1 al., 2010; Mason et al., 2013). Two pools of apical actomyosin have been identified:  
2 junctional actomyosin, closely associated with apical adherens junctions, as well as  
3 apical-medial actomyosin, a highly dynamic pool underlying the free apical domain  
4 (Levayer and Lecuit, 2012; Röper, 2015).

5 Another prominent cell behaviour during morphogenesis in all animals is cell  
6 intercalation, the directed exchange of neighbours, that is for instance the driving  
7 force behind events such as convergence and extension of tissues during  
8 gastrulation. Also during cell intercalation apical actomyosin activity is crucial to  
9 processes such as junction shrinkage and junction extension that underlie this cell  
10 behaviour (Collinet et al., 2015; Rauzi et al., 2010). Importantly, all cell behaviours  
11 during morphogenesis require close coordination between neighbouring cells. This is  
12 achieved on the one hand through tight coupling of cells at adherens junctions, but  
13 also through coordination of actomyosin behaviour within groups of cells, often  
14 leading to seemingly supracellular actomyosin structures in the form of interlinked  
15 meshworks and cables (Blankenship et al., 2006; Röper, 2012; Röper, 2013).

16 The coordination between cells at the level of adherens junctions as well as  
17 actomyosin organisation and dynamics allows a further important aspect of  
18 morphogenesis to be implemented: the force propagation across cells and tissues.  
19 There is mounting evidence from different processes in *Drosophila* that force  
20 generated in one tissue can have profound effects on morphogenetic behaviour and  
21 cytoskeletal organisation in another tissue. For instance during germband extension  
22 in the fly embryo, the pulling force exerted by the invagination of the posterior midgut  
23 leads to both anisotropic cell shape changes in the germband cells (Lye et al., 2015)  
24 and also assists the junction extension during neighbour exchanges (Collinet et al.,  
25 2015). During mesoderm invagination in the fly embryo, anisotropic tension due to  
26 the elongated geometry of the embryo leads to a clear anisotropic polarisation and  
27 activity of apical actomyosin within the mesodermal cells (Chanet et al., 2017).

1           We have previously shown that in the salivary gland placode during early tube  
2 formation when the cells just start to invaginate, the placodal cells contain prominent  
3 junctional and apical-medial actomyosin networks (Booth et al., 2014). The highly  
4 dynamic and pulsatile apical-medial pool is important for apical constriction of the  
5 placodal cells, and constriction starts in the position of the future pit and radiates  
6 outwards from there (Booth et al., 2014). The GPCR-ligand Fog is important for  
7 apical constriction and myosin activation in different contexts in the fly (Kerridge et al.,  
8 2016; Manning et al., 2013), and *fog* expression is also clearly upregulated in the  
9 salivary gland placode downstream of two transcription factors, Fkh and Hkb (Chung  
10 et al., 2017; Myat and Andrew, 2000b). Fkh is a key factor expressed in the placode  
11 directly downstream of the homeotic factor Sex combs reduced (*Scr*) that itself is  
12 necessary and sufficient to induce gland fate (Myat and Andrew, 2000a; Panzer et al.,  
13 1992). *fkh* mutants fail to invaginate cells from the placode, with only a central  
14 depression within the placode forming over time (Myat and Andrew, 2000a).

15           Here, we use morphometric methods, in particular strain rate analysis  
16 (Blanchard et al., 2009), to quantify the changes occurring during early tube  
17 formation in the salivary gland placode. Many morphogenetic processes are aligned  
18 with the major embryonic axes of antero-posterior and dorso-ventral. An excellent  
19 example is germband extension in the fly embryo, where polarised placement of  
20 force-generating actomyosin networks is downstream of the early antero-posterior  
21 patterning cascade (Blankenship et al., 2006; Simoes Sde et al., 2010). In the case  
22 of the salivary gland placode, the primordium of the secretory cells that invaginate  
23 first is roughly circular, with an off-center focus due to the invagination point being  
24 located in the dorsal-posterior corner, prompting us to assess changes within a radial  
25 coordinate framework. In addition to previously characterised apical constriction  
26 (Booth et al., 2014; Chung et al., 2017), we demonstrate that radially oriented  
27 directional intercalation of placodal cells plays a major contribution to ordered  
28 invagination at early stages. We apply quantitative strain rate analysis at different

1 apical-basal depths in the cells, and uncover cell behaviours in a 3D context: near  
2 the pit of invagination, where medial myosin II is strong (Booth et al., 2014), cells are  
3 isotropically constricting apically leading to cell wedging, and with distance from the  
4 pit cells progressively tilt towards the pit. Cells also interleave apically in a  
5 circumferential direction, i.e. they contact different neighbours along their length, a  
6 process that can be compared to a T1 transition in depth. This strongly suggests  
7 apically driven behaviours, and we show that across the placode junctional myosin II  
8 is enriched in circumferential junctions leading to polarised initiation of cell  
9 intercalation. This is followed by polarised resolution of exchanges towards the pit,  
10 thereby contributing to tissue invagination. *forkhead* mutants, that fail to form an  
11 invagination, only show unproductive intercalations that fail to resolve directionally,  
12 likely due to the lack of an active pit. Thus, tube budding depends on a radial pattern  
13 of 3D cell behaviours, that are themselves patterned by the radially polarised activity  
14 of apical myosin II pools. The continued initiation of cell intercalation but lack of  
15 polarised resolution in the *fkh* mutant, where the invagination is lost, suggest that a  
16 tissue-intrinsic mechanical interplay also contributes to successful tube budding.  
17

## 1 **Results**

2

### 3 ***Apical cell constriction is organised in a radial pattern in the salivary gland***

#### 4 ***placode***

5 Upon specification of the placode of cells that will form the embryonic salivary gland  
6 at the end of embryonic stage 10, the first apparent change within the apical domain  
7 of placodal cells is apical constriction at the point that will form the first point of  
8 invagination or pit (Fig.1 A,B; (Booth et al., 2014; Myat and Andrew, 2000b)). Apical  
9 constriction at this point in fact preceded actual tissue bending (Fig. 1 B). We have  
10 previously shown that apical constriction is clustered around the pit and is important  
11 for proper tissue invagination and tube formation (Booth et al., 2014). In order to  
12 discover if any further cell behaviours in addition to apical constriction drive tissue  
13 bending and tube invagination in the early placode, we employed quantitative  
14 morphometric tools to investigate the process in comparable wild-type time-lapse  
15 movies using strain rate analysis (Blanchard et al., 2009). We imaged embryos  
16 expressing a lateral plasma membrane label in all epidermal cells as well as a  
17 marker that allows identification of placodal cells (Fig.1C and Suppl.Movie 1; for  
18 genotypes see Table 1). Time-lapse movies were segmented and cells tracked using  
19 previously developed computational tools that allow for the curvature of the tissue to  
20 be taken into account (Fig.1 C-F)(Blanchard et al., 2009; Booth et al., 2014). The  
21 cells of the salivary gland placode that will later form the secretory part of the gland  
22 are organised into a roughly circular patch of tissue prior to invagination and maintain  
23 this shape during the process (Fig.1C). Within this circular patch, the invagination pit  
24 is located at the dorsal-posterior edge rather than within the centre of the placode.  
25 We therefore employed a radial coordinate system, with the forming pit as its origin,  
26 to analyse and express any changes (Fig.1E). We locally projected 2D strain  
27 (deformation) rates and other oriented measures onto these radial ('rad') and  
28 circumferential ('circ') axes (Fig. 1F).

1 We focused our analysis on the early stages of tissue bending and  
2 invagination, defining as  $t=0$  the time point before the first curvature change at the  
3 point of invagination at the tissue level could be observed. Dynamic analysis of the  
4 changes in apical area and apical cell aspect ratio (a measure of cell elongation) of  
5 placodal cells, in the time interval of 18 min prior to and 18 min after the first tissue  
6 bending, revealed distinct zones of apical cell behaviour (Fig.1). Even prior to onset  
7 of tissue bending (Fig.1G,  $t=0$ ), the apical area of cells near the pit (Fig.1G, black  
8 arrow and 1H) began to reduce, with cells farthest from the pit being larger and more  
9 elongated (Fig.1G). Grouping the placodal cells into ~2-cell-wide stripes concentric to  
10 the pit for apical area change analysis (Fig.1H') revealed a split into cells whose  
11 apical area over this time interval did not change or changed only slightly (Fig. 1H,  
12 red, yellow and green lines) and cells whose apical area progressively decreased  
13 (Fig.1H, blue and purple lines). The clear split into two zones of differing cell  
14 behaviours, defined by radial distance from the invagination point at zero minutes  
15 (when the pit starts to invaginate), prompted us to analyse these regions  
16 independently in our strain rate analyses (Fig. 1I).

17

18

19 ***Both apical constriction and cell intercalation contribute to the early stages of***  
20 ***tube morphogenesis***

21 Methods have been developed previously to calculate strain (deformation) rates for  
22 small patches of tissue, and to further decompose these into the additive  
23 contributions of the rates of cell shape change and of the continuous process of cell  
24 rearrangement (intercalation) (Blanchard, 2017; Blanchard et al., 2009) (Fig. 2A,B).  
25 The levels of both contributions vary dramatically between different morphogenetic  
26 processes (Blanchard et al., 2010; Bosveld et al., 2012; Butler et al., 2009; Etournay  
27 et al., 2015; Guirao et al., 2015). Cell divisions have ceased in the placode around  
28 the time of specification, and there is also no cell death, therefore none of these



1 processes contributed to the overall tissue deformation in this case. Upon  
2 segmentation of cell outlines the rate of tissue deformation was calculated from the  
3 relative movement of cell centroids in small spatio-temporal domains of a central cell  
4 surrounded by its immediate neighbours and over 3 movie frames (~6 min).  
5 Independently, for the same domains, rates of cell shape change were calculated  
6 mapping best-fitted ellipses to actual cell shapes over time. The rate of cell  
7 intercalation could then be deduced as the difference between these two measures  
8 (Fig.2A,B and Suppl. Movie 2; see Material and Methods for a detailed description).  
9 The three types of strain rate measure were then projected onto our radial coordinate  
10 system.

11 Strain rate analysis of changes within the apical domain of the epithelial cells  
12 in the early salivary gland placode clearly confirmed the existence of two distinct  
13 zones of cell behaviour. Spatial plots summarising ~36 mins of data centred around  
14 the first tissue bending event (combined from the analysis of 9 wild-type embryos;  
15 Suppl.Fig.2A) revealed strong isotropic tissue contraction near the invagination pit  
16 (Fig.2C' and Suppl.Fig.2B, green) that was mainly contributed by apical cell  
17 constriction (Fig.2C'' and Suppl.Fig.2B'). At a distance from the pit, tissue elongation  
18 dominated in the radial direction (Fig.2C', magenta) and was contributed by both cell  
19 elongation and cell intercalation (Fig. 2C'',C'''). The split in behaviour and the strong  
20 contribution of cell intercalation to the early invagination and tube formation was even  
21 more apparent from time resolved strain rate analyses. At the whole tissue level,  
22 apical cell constriction began more than 10 min before any curvature change at the  
23 tissue level (Suppl.Fig.2 C,C', green curve), and this change was most pronounced in  
24 the cells near the invagination pit (Fig. 2 D,D' versus E, E', green curve). In addition,  
25 cell intercalation also commenced about 10 min prior to tissue bending  
26 (Suppl.Fig.2C,C', orange curve), but in this case the stronger contribution came from  
27 cells far from the pit (Fig.2 E,E' versus D,D', orange curve).

1           Whereas constriction was isotropic near the pit, with equally large magnitudes  
2           contributing both radially and circumferentially (Fig. 2 D,D', green curves),  
3           intercalation was clearly polarised towards the invagination pit, with expansion  
4           radially in the orientation of the pit (Fig. 2D,E and Suppl.Fig.2C, 'rad', orange curves),  
5           and contraction circumferentially (Fig. 2 D',E' and Suppl.Fig.2C', 'circ', orange  
6           curves).

7           Thus, in addition to apical constriction, directional cell intercalation provides a  
8           major second cell behaviour contributing to tissue bending and invagination of a tube.  
9           Furthermore, the amount of both cell behaviours occurring was radially patterned  
10          across the placode. However, it was not clear whether these behaviours were being  
11          driven by active apical mechanisms, so we next investigated the 3D behaviours of  
12          placode cells.

13

14

### 15   ***3D tissue analysis at two depth shows coordination of cell behaviours in depth***

16          The apical constriction as observed in the placodal cells near the pit is indicative of a  
17          redistribution of cell volume more basally, which could result in a combination of cell  
18          wedging and/or cell elongation in depth. The 3D-cell behaviour of acquiring a wedge-  
19          like shape is of particular interest in the placode because it is capable of tissue  
20          bending. Apical constriction (coupled with corresponding basal expansion if cell  
21          volume is maintained) is known to deform previously columnar or cuboidal epithelial  
22          cells into wedge-shaped cells (Martin and Goldstein, 2014; Wen et al., 2017). This is  
23          also true in the salivary gland placode, where cross-sections in xz of fixed samples  
24          and time-lapse movies confirm the change from columnar to wedged morphology  
25          (Fig.1B.B')(Girdler and Röper, 2014; Myat and Andrew, 2000b). Most analyses of  
26          morphogenetic processes are conducted with a focus on events within the apical  
27          domain given the prevalent apical accumulation of actomyosin and junctional  
28          components (Fig.3A. A') (Bosveld et al., 2012; Butler et al., 2009; Martin et al., 2009;

1 Rauzi et al., 2010; Simoes Sde et al., 2010). However, this apico-centric view  
2 neglects most of the volume of the cells. For instance in the case of the salivary  
3 gland placode cells extend up to 15  $\mu\text{m}$  in depth (Fig. 3B). We thus decided to  
4 analyse cell and tissue behaviour during early stages of tube formation from the  
5 placode in a 3D context. Automated cell segmentation and tracking of 3D behaviours  
6 is still unreliable in the case of tissues with a high amount of curvature, such as in the  
7 salivary gland placode once invagination begins. To circumvent this issue, we used  
8 strain rate analysis at different depth as a proxy for a full 3D analysis (Fig. 3A',C).  
9 After accounting for the overall curvature of the tissue, we segmented and tracked  
10 placodal cells not only within the apical region (as shown in Figs 1 and 2), but also at  
11 a more basal level,  $\sim 8 \mu\text{m}$  below the apical domain (Fig. 3A',C), and repeated the  
12 strain rate analysis (Fig. 3D-F'' and Suppl. Fig.3). We used the same radial  
13 coordinate system with the pit as the origin for both layers, so we were able to  
14 compare cell behaviours between depths. Segmentation and analysis at the most-  
15 basal level of placodal cells was not reliably possible due low signal-to-noise-ratio of  
16 all analysed membrane reporters at this depth (data not shown).

17 Overall, the spatial pattern of change at mid-basal level was similar to  
18 changes within the apical domain during 33 min centred around the start of tissue  
19 bending (Fig. 3D and Suppl. Fig.3 B). Isotropic tissue contraction at mid-basal depth  
20 was clustered around the position of the invagination pit (Fig. 3D and Suppl. Fig.3B,  
21 green), and this was due to cell constriction at this level (Fig. 3D', and Suppl. Fig.3B'),  
22 whereas the tissue expansion at a distance from the pit in the radial direction (Fig.  
23 3D) was due primarily to cell intercalation (Fig.3D''). Similarly to events at the apical  
24 level, this radial expansion towards the pit was accompanied by a circumferential  
25 contraction, again due primarily to cell intercalation in the region away from the pit  
26 (Suppl.Fig.3 B, B'').

27 Comparing apical and basal strain rates at the cell and tissue level with  
28 respect to their radial and circumferential contributions revealed an interesting picture.

1 In temporally resolved plots, isotropic cell constriction dominated apically in cells near  
2 the pit (Fig.3E', magenta), but with a slower rate of constriction at mid-basal depth  
3 (Fig.3E', blue). This was confirmed by cross-section images that show that, near the  
4 pit and once tissue-bending had commenced, the basal surface of the cells was  
5 displaced even further basally than in the rest of the placode, and cells were  
6 expanded at this level, leading to an overall wedge-shape (Fig.1B'). In cells away  
7 from the pit, similar to the apical region, cell shapes did not change much (Fig. 3 F').  
8 In contrast to cell shape changes that diverged at depth, at least near the pit,  
9 intercalation behaviour appeared to be highly coordinated between apical and basal  
10 levels with near identical contributions at both depth across the placode (Fig. 3 E'', F''  
11 and Suppl.Fig. 3C'').

12

13

#### 14 ***Patterns of cell wedging, interleaving and tilt in the placode***

15 In cells near to the pit, the faster rate of apical constriction implies that cell  
16 wedging is occurring, but we have not confirmed this in the same dataset by  
17 measuring the relative sizes of apical and basal cell diameters. Similarly, though the  
18 rates of apical and basal intercalation are remarkably similar, this does not rule out  
19 that the actual arrangement of cells at one level is 'tipped' ahead of the other,  
20 through interleaving in depth (akin to a T1 transition along the apical-basal axis). For  
21 example, if cell rearrangement is being driven by an active apical mechanism, we  
22 predict that apical cell contours would be intercalating ahead of basal cell contours,  
23 even while their rates remain the same. Both wedging (Fig. 4B) and interleaving  
24 (Fig.4D) have implications for the tilt, or lean, of cells relative to epithelial surface  
25 normals (Fig. 4F), with a gradient of tilt expected for constant wedging or interleaving  
26 in a flat epithelium. We therefore set out to quantify 3D wedging, interleaving and cell  
27 tilt with new methods.

1           We used the placodes for which we have tracked cells at both apical and mid-  
2 basal levels (n=5). First we developed a semi-automated method to accurately match  
3 cell identities correctly between depths (Fig. 4A and Suppl.Movie 3, and see  
4 Methods). We then borrowed ideas from recent methods developed to account for  
5 epithelial curvature in terms of the additive contributions of cell wedging and  
6 interleaving in depth (Deacon, 2012). In the early developing salivary gland placode,  
7 average tissue curvature is very slight, so we simplified the above methods for flat  
8 epithelia. We applied exactly the same methods that we have used in Figures 2 and  
9 3 to calculate strain rates for small cell domains, but rather than quantifying rates of  
10 deformation over time, now we quantify rates of deformation in depth. The cell shape  
11 strain rate becomes a wedging rate, in units of proportional shape change per micron  
12 in z (Fig. 4B,C), the intercalation strain rate becomes the interleaving strain rate, in  
13 the same units (Fig. 4D,E), and translation velocity becomes the rate of cell tilt (Fig.  
14 4F,G and Suppl. Fig. 4A,B; see Methods for details). Once again, we projected the z-  
15 strain rates and tilt onto our radial coordinate system.

16           Cells across the placode started out at -18 mins before pit invagination  
17 unwedged and mostly untilted in radial and circumferential orientations (Fig. 4C,G).  
18 Cells near the pit became progressively wedge-shaped over the next 30 minutes,  
19 with smaller apices (Fig. 4C, orange lines). Cell wedging was reasonably isotropic,  
20 but with circumferential wedging always stronger than radial. Away from the pit,  
21 progressive wedging was less rapid, again with a strong circumferential contribution  
22 but nearly no radial contribution (Fig. 4C, blue lines). That cells were less wedged  
23 radially might be because this is the orientation in which cells move into the pit,  
24 releasing radial pressure due to apical constriction near the pit.

25           The wedging anisotropy is also compatible with active circumferential  
26 contraction. Indeed, circumferential interleaving was always more negative than  
27 radial interleaving, often significantly so (Fig. 4E, solid vs dashed lines). Thus,  
28 interleaving contributes a circumferential tissue contraction apically, with a

1 concomitant radial expansion. This pattern is thus also compatible with an apical  
2 circumferential contraction mechanism, possibly driving cell rearrangements.

3 Cell tilt, a measure of the divergence of a cell's in-line from the surface normal  
4 (Fig. 4F and Suppl.Fig. 4A, B), increased continuously in the radial direction towards  
5 the pit over the period of our analysis (Fig. 4G, solid lines). A stronger rate of tilt was  
6 observed for the cells further from the pit (Fig. 4G', purple solid line), which is  
7 expected from the radial wedging seen near the pit (Fig. 4C, solid orange line).

8 Hence, the relatively isotropic rates of apical constriction near the pit and the  
9 very similar rates of intercalation apically versus basally were in fact grounded in  
10 anisotropic wedging near the pit and in an interleaving difference between apical and  
11 basal. 3D tissue information such as wedging, interleaving and tilt are therefore  
12 essential to fully understand planar cell behaviours such as cell shape change and  
13 intercalation. Overall, our combined analysis so far suggests that isotropic apical  
14 constriction near the pit combines with an active apical circumferential contraction  
15 mechanism. We now investigate the possible origins of the latter.

16

17

18 ***Radially polarised T1 and rosette formation and resolution underlie cell***  
19 ***intercalation in the placode***

20 Our strain rate analysis has revealed that the intercalation strain rate, representing  
21 the continuous process of slippage of cells past each other, was a major contributor  
22 to early tube formation and was highly coordinated between apical and basal  
23 domains. 3D domain interleaving further revealed that cell rearrangement  
24 convergence is more advanced apically in the circumferential orientation. Both these  
25 findings are measured from small groups of cells across the placode but are agnostic  
26 about neighbour exchange events or more complicated multi-neighbour exchanges.  
27 Neighbour exchanges or cell intercalations are usually thought to occur through one  
28 of two mechanisms: groups of four cells can exchange contacts through the

1 formation of a transient 4-cell vertex structure, in a typical T1 exchange (Fig. 5A),  
2 whereas groups of more than four cells can form an intermediary structure termed a  
3 rosette, followed by resolution of the rosette to create new neighbour contacts (Fig.  
4 5B). During convergence and extension of tissues in both vertebrates and  
5 invertebrates, the formation and resolution of these intermediate structures tend to be  
6 oriented along embryonic axis, with the resolution occurring perpendicular to the  
7 formation (Blankenship et al., 2006; Lienkamp et al., 2012). We therefore decided to  
8 also analyse intercalation in the placode by following individual events to identify the  
9 underlying mechanistic basis.

10 From our database of apical cell tracks and their connectivity, we identified all  
11 T1 transitions, classifying the time point when pairs of cells become new neighbours  
12 as 'neighbour gains'. We further sub-classified neighbour gains as being either  
13 radially or circumferentially oriented, depending on which orientation was closest to  
14 the centroid-centroid line of two cells involved in a neighbour gain (Fig. 5C). T1s  
15 occurred at a constant rate over our study period, and we observed T1s in both  
16 orientations, revealing that neighbour connectivity was quite dynamic (Fig.5C').  
17 Nevertheless, over two-thirds of neighbour gains were oriented circumferentially, a  
18 bias that correlates with the intercalation strain rate contraction circumferentially (see  
19 for example Fig. 2E'). We defined the number of productive neighbour gains as the  
20 difference between circumferential and radial gains, since equal numbers of both  
21 would cancel each other out. In order to control for any variability between placodes  
22 or between the number of cells tracked per placode, we expressed the number of  
23 productive gains as a proportion of the number of cell-cell contacts that were  
24 available to perform a circumferential T1 per time step (see Methods). The proportion  
25 of productive circumferential gains was approximately constant, which lead to a  
26 steady net gain over time (Fig. 5C'').

27 In addition to typical T1 exchanges, multicellular rosette structures could  
28 easily be identified amongst the placodal cells (Fig.5 D-E). Rosette formation began

1 prior to the first sign of tissue-bending, but the number of rosettes per placode  
2 increased afterwards (Fig. 5D,D'). Rosettes were usually formed of 5-7 cells, with  
3 most involving only 5 cells (Fig. 5D', E). By contrast, rosettes observed during  
4 *Drosophila* germband extension can be formed of up to 12 cells (Blankenship et al.,  
5 2006). The strain rate analysis already indicated that, overall, intercalation events  
6 should be polarised to produce a contraction in the circumferential orientation with  
7 the corresponding expansion polarised towards the pit (Fig. 2 C-E'). Analysis of  
8 rosette formation and resolution in our time-lapse datasets of embryos expressing a  
9 membrane marker demonstrated that groups of cells contracted in a circumferential  
10 orientation to form a rosette, the resolution of which then moved individual cells  
11 towards the invaginating pit (Fig. 5E and Suppl.Movie 4), thereby leading to the  
12 expansion observed in the strain rate analysis.

13

14

15 ***T1 vertex and rosette formation correlates with radial patterning of myosin and***  
16 ***Par3/Bazooka at the apical cortex***

17 Non-muscle myosin II is the major driver of cell shape changes in many different  
18 contexts and systems (Levayer and Lecuit, 2012; Röper, 2013; Röper, 2015), and  
19 myosin II has been shown to play an important role in T1 transitions and in rosette  
20 formation driving the convergence and extension events during germband extension  
21 in the *Drosophila* embryo (Fernandez-Gonzalez et al., 2009; Rauzi et al., 2010). We  
22 imaged embryos expressing palmitoylated RFP (*Ubi-TagRFP-CAAX*) as a membrane  
23 label and a GFP-tagged version of non-muscle myosin II regulatory light chain (called  
24 spaghetti squash, *sqh*, in *Drosophila*) under control of its own promoter in the null  
25 mutant background (*sqhAX[3]; sqhGFP42*) to assess myosin II distribution and  
26 intensity as a proxy for myosin activity (Suppl.Movie 5). In all individual rosette  
27 formation-resolution examples analysed (n= 29), junctional myosin II appeared  
28 particularly enriched in the form of short cable-like structures at the central contact



1 sites of the rosette (Fig.5F,G). These cables initially spanned several cell diameters  
2 and shortened concomitant with the cells being drawn into a central vertex (Fig. 5H).  
3 The orientation of the short myosin cables correlated with the direction of rosette-  
4 formation, but in contrast to germband extension was not always oriented parallel to  
5 the dorsal-ventral axis, but rather following the circumferential coordinates of the  
6 placode.

7         When apical junctional myosin intensity was quantified in fixed samples of  
8 such *sqhGFP* embryos across the early placode, in junctions either oriented radially  
9 towards the invagination pit or circumferentially, a clear enrichment of myosin II was  
10 apparent in circumferentially compared to radially oriented junctions (Fig. 6 A, B).  
11 Such tissue-wide circumferential versus radial polarisation of myosin could assist  
12 both rosette and vertex formation during the polarised cell intercalation events.

13         To compare and correlate junctional myosin II dynamics with the above strain  
14 rate analysis, we analysed myosin II polarisation dynamically across the whole tissue  
15 (Fig. 6C,C'). Quantitative tools that allow junctional polarisation of myosin and other  
16 players to be quantified have previously been established (Fig. 6D, D''; (Tetley et al.,  
17 2016)). Myosin II polarisation at circumferential junctions could either occur through  
18 enrichment at two opposite junctions or sides, termed bi-polarity (Fig.6D' and  
19 Suppl.Movie 6), or through accumulation at a single junction or side within a cell,  
20 termed unipolarity (Fig. 6D'' and Suppl.Movie 6). Starting about 10 min prior to tissue  
21 bending, bi-polar enrichment of myosin II at circumferential junctions was significantly  
22 stronger than at radial junctions when measured across the whole placode (Fig.6E).  
23 Similarly, starting ~5 min later, unipolar enrichment of myosin II at circumferential  
24 junctions dominated over radial enrichment when measured across the whole  
25 placode (Fig. 6F).

26         In cell intercalation events during germband extension, myosin polarisation is  
27 complementary to enrichment of Par3/Bazooka (Baz) as well as Armadillo/ $\beta$ -catenin,  
28 with both enrichments controlled by the upstream patterning and positioning of

1 transmembrane Toll receptors and Rho-kinase (Rok) (Blankenship et al., 2006; Pare  
2 et al., 2014; Simoes Sde et al., 2010). We therefore analysed whether such  
3 complementarity was also present in the early salivary gland placode. Antibody  
4 labelling of Baz often showed a complementarity in membrane enrichment to myosin  
5 II (Fig. 6 G-I), most pronounced where myosin II was organised into circumferential  
6 mini cables during intercalation events (Fig.6G,H). Baz was enriched at radially  
7 oriented junctions where myosin II was low, and vice versa at circumferential  
8 junctions, though in contrast to germband extension, the Baz polarisation did not  
9 extend uniformly across the tissue and was overall less strong than the myosin II  
10 polarisation (Fig.6I).

11 Thus, in order to adapt to a circular tissue geometry and to the need for  
12 ordered invagination through a focal point during the process of tube budding, a  
13 conserved molecular pattern of myosin-Baz complementarity is apparently imprinted  
14 onto the salivary gland placode in a radial coordinate pattern, rather than the  
15 prevailing A-P/D-V pattern of the earlier embryo during germband extension  
16 (Fig.6J,K).

17

18

19 ***Resolution but not initiation of cell intercalation is disrupted in the absence of***  
20 ***Forkhead***

21 In order to address how the radial pattern of behaviours and molecular factors across  
22 the placode is established, we analysed mutants in a key factor of salivary gland tube  
23 invagination, the transcription factor Fork head (Fkh). Fkh is expressed just upon  
24 specification of the placodal cells, directly downstream of the homeotic factor Scr  
25 (Zhou et al., 2001). In *fkh* mutants, invagination of the placode fails, and towards the  
26 end of embryogenesis salivary gland-fated cells undergo apoptosis as Fkh appears  
27 to prevent activation of pro-apoptotic factors (Jurgens and Weigel, 1988; Myat and  
28 Andrew, 2000a). Previous studies have concluded that Fkh promotes cell shape

1 changes important for invagination, in particular apical constriction (Chung et al.,  
2 2017; Myat and Andrew, 2000a). Fkh is not the only transcription factor important for  
3 correct changes during invagination, but works in parallel to e.g. Hucklebein (Hkb),  
4 the lack of which also confers significant problems with apical cell shape changes  
5 and invagination (Myat and Andrew, 2000b; Myat and Andrew, 2002).

6 We combined a *fkh* null mutant (*fkh[6]*) with markers allowing membrane  
7 labeling and cell segmentation (*Ubi-TagRFP-CAAX*) as well as myosin II  
8 quantification (*sqhGFP*; see Suppl.Movie 7). When *fkh* mutant placodes were  
9 compared to wild-type ones at late stage 11 (beyond the time window analysed here)  
10 then *fkh* mutant placodes showed no sign of a dorsal-posterior invagination point  
11 (Fig.7 A-B'). In fact, many placodes beyond late stage 11 showed a centrally located  
12 shallow depression (Fig. 7A,A', yellow dotted lines). Strain rate analysis of 5  
13 segmented movies of *fkh[6]* mutant placodes, spanning the equivalent time period to  
14 the wild-type movies analysed above (Suppl. Fig.7C), showed that there was no  
15 constriction at the tissue level near the pit (Fig. 7C-E and Suppl. Fig. 7 D, D'). In fact  
16 if anything there was a slight tissue expansion (Fig.7E) caused by a slight expansion  
17 at the cell level (Fig. 7E'), with zero intercalation (Fig. 7 E''). Away from the pit *fkh[6]*  
18 mutant placodes expanded slightly (Fig.7F and Suppl. Fig.7 E, E'), again mostly due  
19 to cell shape changes (Fig. 7F', F'').

20 Is this strong reduction of cell behaviours due to a complete 'freezing' of the  
21 placode in the *fkh[6]* mutant? We analysed whether junctional myosin II was still  
22 polarised in the *fkh[6]* mutant placodes. In fixed and live samples, *fkh[6]* mutant  
23 placodes still showed the circumferential actomyosin cable surrounding the placode  
24 (Suppl.Fig.8E' and I''', compare to D' and H'''; (Röper, 2012)). When myosin II  
25 unipolarity and bi-polarity were quantified from 5 segmented and tracked movies, at  
26 the tissue-level there was a strong and significant reduction in myosin II polarisation,  
27 with no difference between radial and circumferential orientations in either measure  
28 and myosin II bi-polarity indistinguishable from zero (Fig. 8 A,B). Nonetheless, cells

1 were not static but in fact neighbour exchanges were present, both in form of T1  
2 exchanges and rosettes (Fig.8C-F). The quantitative analysis of neighbour gains  
3 from segmented and tracked movies in the *fkh[6]* mutant revealed that gains  
4 accumulated both circumferentially as well as radially, at a rate comparable to that  
5 observed in the control (Fig. 8E). However, in contrast to the control, where  
6 circumferential gains significantly outweighed radial neighbour gains leading to a  
7 positive net rate of productive circumferential gains (Fig.8F, green line), in the *fkh[6]*  
8 mutant circumferential and radial gains occurred in equal amounts (Fig.8E) leading to  
9 a near zero net gain (Fig. 8F, pink line). Interestingly, when focusing on individual  
10 events such as rosettes, despite a loss of tissue-wide myosin II polarisation, myosin  
11 II was still enriched at the central constricting junction (Fig. 8Cd'), and in still pictures  
12 remnants of myosin II-Baz complementarity could be identified (Suppl.Fig.8L-M).

13 Therefore, although at the tissue and cell shape level *fkh[6]* mutant placodes  
14 appear near static, the close analysis of individual events revealed a dynamic but  
15 unpolarised behaviour, with intercalation occurring, probably driven by the remnant  
16 myosin II polarisation, but with no polarised resolutions.

17

## 1 **Discussion**

2

3 Morphogenesis sculpts many differently shaped tissues and structures during  
4 embryogenesis. A core set of molecular factors that are the actual morphogenetic  
5 effectors is repeatedly used, such as actomyosin allowing contractility or cell-cell  
6 adhesion components allowing coordination and mechanical propagation of cell  
7 behaviours across tissues. Such core morphogenetic effectors or effector modules  
8 are used reiteratively in different tissues and at different times, whereas the activity of  
9 upstream activating gene regulatory networks leading to tissue identity, but also initial  
10 tissue geometry and mechanical constraints, are highly tissue-specific.

11 During tube formation of the salivary glands in the fly embryo, we observe a  
12 clear tissue-level radial organisation of both cell behaviours and molecular factors  
13 driving these, with the off-centre located invaginating pit as the organising focal point  
14 (Fig. 8G,H). The cell behaviours of cell shape change and cell intercalation that we  
15 identified within the apical domain have previously been shown to drive other  
16 morphogenetic processes (Butler et al., 2009; Collinet et al., 2015; Lee and Harland,  
17 2007; Lye et al., 2015; Martin and Goldstein, 2014; Martin et al., 2009; Plageman et  
18 al., 2011; Rauzi et al., 2010), but in our system, they are utilised within a radial  
19 coordinate system, thereby driving the formation of a narrow tube of epithelial cells  
20 from a round placode primordium. Interestingly, even the molecular factors that are  
21 involved in these behaviours in other contexts also contribute in the salivary gland  
22 placode, again being adjusted to create a radial/circumferential pattern. The main  
23 question to answer therefore is what allows the 'twisting' of a system that is earlier in  
24 embryogenesis used within an anterior-posterior/dorsal-ventrally polarised coordinate  
25 system into the radial coordinates observed here?

26 Our analysis suggests at least a two-fold contribution. A number of factors,  
27 both transcription factors as well as potential morphogenetic effectors, are expressed  
28 in the salivary gland placode in a temporally shifting pattern, initially restricted to the

1 location of the forming invagination pit, and then slowly expanding in expression  
2 across the whole placode (Fig. 8H). Examples include the expression of the  
3 transcription factors Fkh (Suppl.Fig. 8A-C) , Hkb and Fog, but also of factors such as  
4 the polarity factor and homophilic interactor Crumbs (Suppl. Fig. 8D', H'', N), the non-  
5 receptor tyrosine kinase Btk29A/Tec29 (Suppl.Fig.8 H'), the dynein-associated  
6 protein Klarsicht and the Toll-like receptor 18-wheeler (Chandrasekaran and  
7 Beckendorf, 2005; Kolesnikov and Beckendorf, 2007; Myat and Andrew, 2000b; Myat  
8 and Andrew, 2002; Panzer et al., 1992). Which of these or other factors expressed in  
9 a similar pattern leads to the radial tissue-polarisation of for instance myosin II and  
10 Bazooka across the placode is as yet unclear (Fig. 8H). Differing levels of Crumbs  
11 protein, with levels reducing with distance from the pit and a sharper step change in  
12 between secretory and duct primordium, could for instance assist myosin II  
13 accumulation in circumferentially-oriented junctions, as we have shown previously  
14 that step changes in Crumbs can pattern actomyosin accumulation (see schematic in  
15 Suppl.Fig.8N; (Röper, 2012; Thompson et al., 2013)).

16 In addition to this potential radial polarisation through upstream expression  
17 control, the positioning and invagination of the pit is another factor underlying the  
18 radial polarisation of behaviours, with for instance the intercalation strain rate  
19 increasing with the onset of invagination (Fig. 2E and Suppl.Fig.2C). In the *fkh*  
20 mutant no pit is specified and, over the time period analysed here, no invagination or  
21 tissue-bending is observed anywhere across the placode, and at the tissue-level,  
22 polarisation of myosin II is lost. Nonetheless, in individual rosette formation events  
23 (Fig. 8C) and in small regions of the placode (Suppl. Fig.8L-M) myosin II polarisation  
24 remains and neighbour exchanges occur at a rate comparable to the control but fail  
25 to contribute to an overall tissue change during early stages. In the *fkh* mutant  
26 several of the factors that in the wild-type show a temporal radial expression shift  
27 originating from the pit in the corner of the placode are now either homogeneously  
28 expressed across the placode (Btk29A, Suppl.Fig.8I,I') or at higher levels in the

1 centre of the placode (Crumbs, Suppl.Fig.8E', l''), thereby most likely affecting the  
2 polarisation of downstream factors. The circular topology of a flat epithelial  
3 primordium with tube budding from an off-centre location is not unique to the salivary  
4 gland placode but for instance also seen in the posterior spiracles in the *Drosophila*  
5 embryo (Simoes et al., 2006) as well as during dorsal appendage formation in the  
6 germline (Claret et al., 2014), so it will be interesting to determine in the future  
7 whether other aspects of the radial polarisation are in common.

8         Not only the fully invaginated epithelial tube of the salivary glands is a 3D  
9 structure, but already the epithelial primordium of the placode, though flat at this  
10 stage, should be considered as a 3D rather than a 2D entity, due to the apical-basal  
11 extension of the epithelial cells. Supporting this notion, our strain rate analysis in  
12 depth has revealed many interesting features. It is still quite unclear whether  
13 epithelial morphogenetic behaviours are initiated apically and propagated basally and  
14 in how much there is an active contribution through events initiated at lateral or basal  
15 sides. A few recent reports suggest that not all is apically initiated (Monier et al.,  
16 2015; Sun et al., 2017), but whether this is a general principle or highly tissue-  
17 specific is unclear. It is also unclear how any cell behaviour, whether initiated apically  
18 or basally, is communicated and propagated across the length of the cell. In many  
19 morphogenetic processes including the tube budding from the salivary gland placode,  
20 actomyosin and other morphogenetic effectors are concentrated within the apical  
21 junctional domain. Our data at depth reveal that there is close coordination of  
22 intercalation between apical and mid-basal levels, and that the dynamic changes in  
23 interleaving and wedging strongly support an active apical mechanism that is  
24 followed further basally.

25         Non-equilibrium 3D cell geometries in a flat epithelium, such as those caused  
26 by the wedging, interleaving and tilting analysed here, evolve in revealing patterns  
27 during early placode morphogenesis. The appearance and progressive increase in  
28 these out-of-equilibrium geometries in the placode precede the start of 3D pit

1 invagination by more than 10 minutes. This could suggest that during this phase a  
2 pre-pattern of tension could build up across the placode that would make the pit  
3 invagination more efficient, once initiated. Some of the cell behaviours we observe  
4 and the resulting complex 3D shapes might then be the non-intuitive results of the  
5 balance of forces in the changing mechanical context of the placode. This will be  
6 possible to test experimentally by interference with certain behaviours or through  
7 ectopic induction of others, and can also be tested in silico in the future.

8         In summary, the radial patterning of the placode is key for both the radial-  
9 circumferential polarisation of the actomyosin cytoskeleton as well as for the  
10 specification of the first point of tissue-bending. As we have previously shown, in  
11 addition to the polarised junctional accumulation of myosin, an apical-medial pool of  
12 myosin accumulates most strongly in the cells near to the pit and drives the apical  
13 constriction of cells (Booth et al., 2014). This additional radial patterning of different  
14 actomyosin pools might well underlie the differing cell behaviours of cells near to and  
15 far from the pit (Fig.8G), with circumferentially enriched junctional myosin driving the  
16 initiation of intercalation events, be it T1s or rosettes, and medial myosin driving  
17 strong isotropic constriction and tissue bending of the invagination point. Once the  
18 tissue bending has initiated, the mechanical force of the invagination orients the  
19 polarised resolution of intercalation events (Fig.8H). Such mechanical influence on  
20 the orientation of intercalation is reminiscent of germband extension, where the  
21 pulling from the invagination of another neighbouring tissue, the posterior midgut,  
22 influences the intercalation (Collinet et al., 2015; Lye et al., 2015). In the salivary  
23 gland placode, radial patterning and mechanical input both originate from within the  
24 same tissue, and it will be interesting to explore how conserved such organisation is  
25 across other tube-forming tissue primordia.

26

27



Figure 1. Sanchez et al.

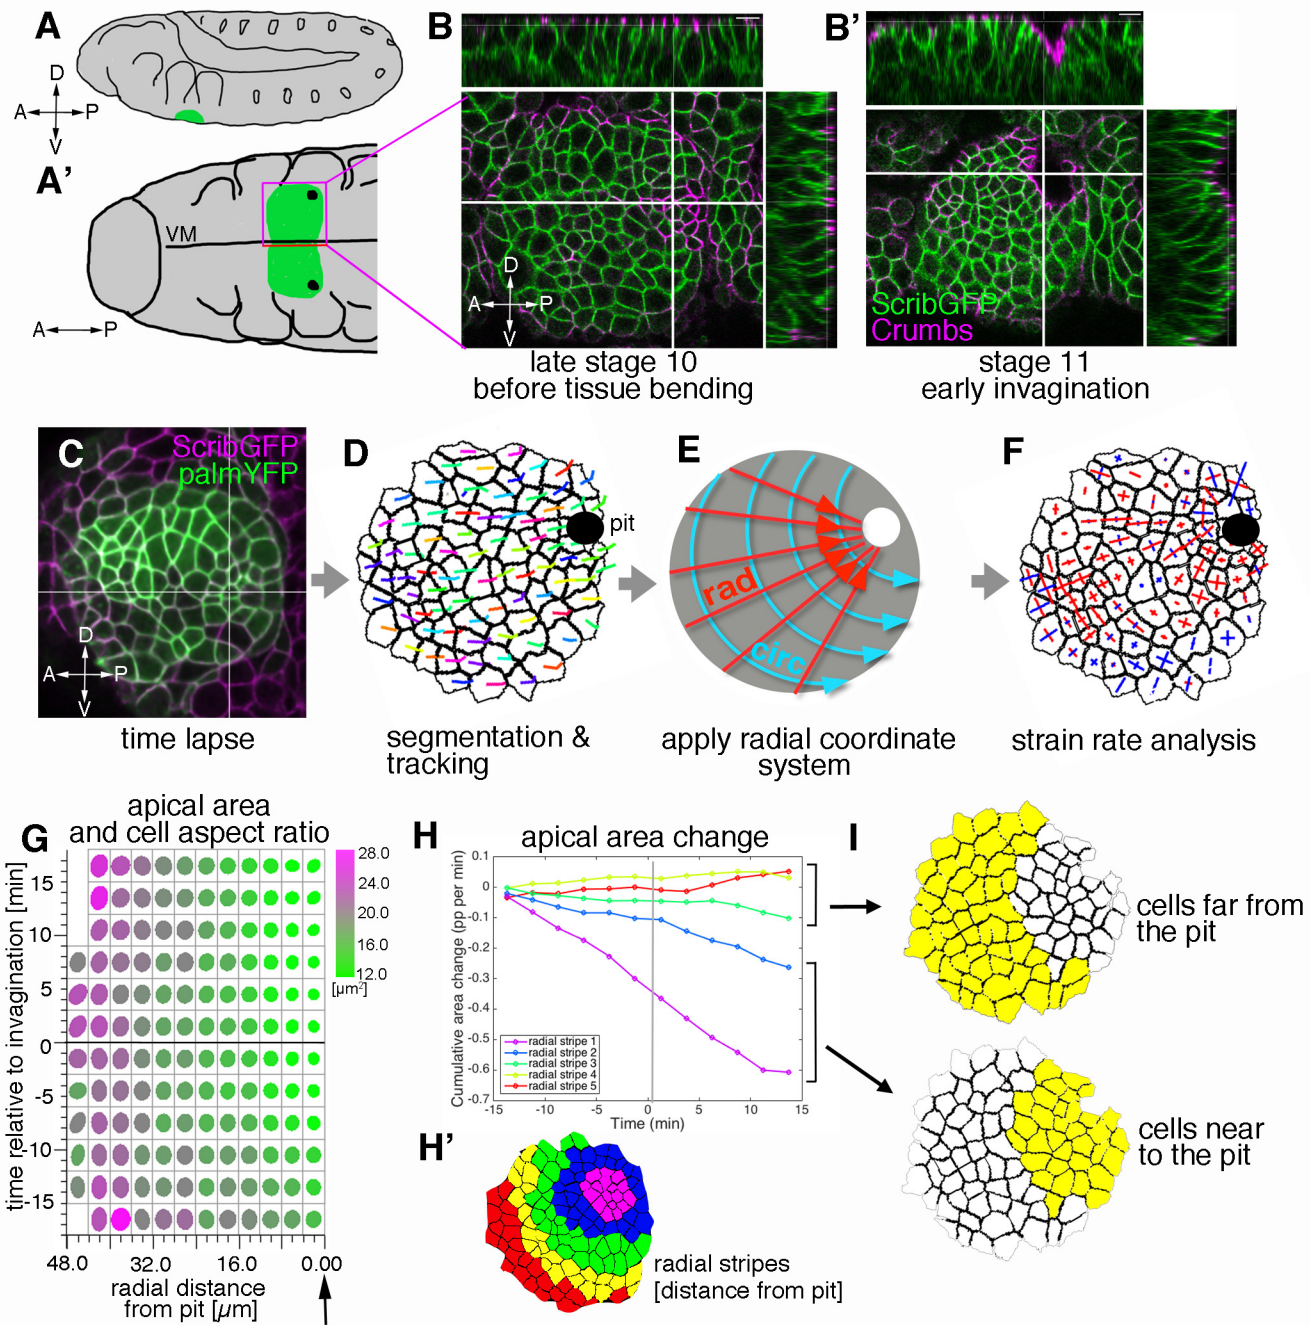

1 **Figure Legends**

2

3 **Figure 1. Morphogenetic events in the salivary gland placode show a radial**  
4 **organisation.**

5 **A, A'** Schematic of a stage 11 *Drosophila* embryo highlighting the position of the  
6 salivary gland placode (green) in lateral (**A**) and ventral (**A'**) views.

7 **B, B'** Surface and cross-section views of the salivary gland placode just prior to the  
8 first tissue bending (**B**) and once the initial pit of invagination has formed (**B'**). Lateral  
9 membranes are labelled by ScribbleGFP (green) and apical cell outlines by Crumbs  
10 (magenta).

11 **C-F** Workflow of the morphometric analysis. Early salivary gland placode  
12 morphogenesis is recorded by time-lapse analysis using markers of cell outlines (**C**),  
13 cells are segmented and tracked over time (**D**). Data are recorded and expressed in  
14 a radial coordinate system (**E**; 'rad' is the vectorial contribution radially towards the pit,  
15 'circ' is the vectorial circumferential contribution). Various derived measures are  
16 projected onto the radial coordinate system. Here, projected small domain  
17 deformation (strain) rates (Blanchard et al., 2009) are shown (**F**; contraction in red,  
18 expansion in blue). See also Suppl. Movies 1 and 2.

19 **G** Temporally and spatially resolved analysis of apical area and cell aspect ratio  
20 changes over the time interval 18 min prior to first tissue bending to 18 min after  
21 bending commences. The placode is radially organised into areas of cells with very  
22 different behaviour: cells near the invagination pit (arrow, distance 0  $\mu\text{m}$ ) isotropically  
23 shrink their apical area (green), whereas cells near the periphery expand  
24 anisotropically (magenta).

25 **H-I** Cumulative time-resolved analysis of apical area change (**H**), grouping the  
26 placodal cells into radial stripes (**H'**) for the analysis. This reveals a clear split in  
27 behaviour between cells far from the pit (**I**, top; area change value  $\sim 0$ ) and cells near  
28 the pit (**I**, bottom; constriction, consistently negative area change)

Figure 2. Sanchez et al.

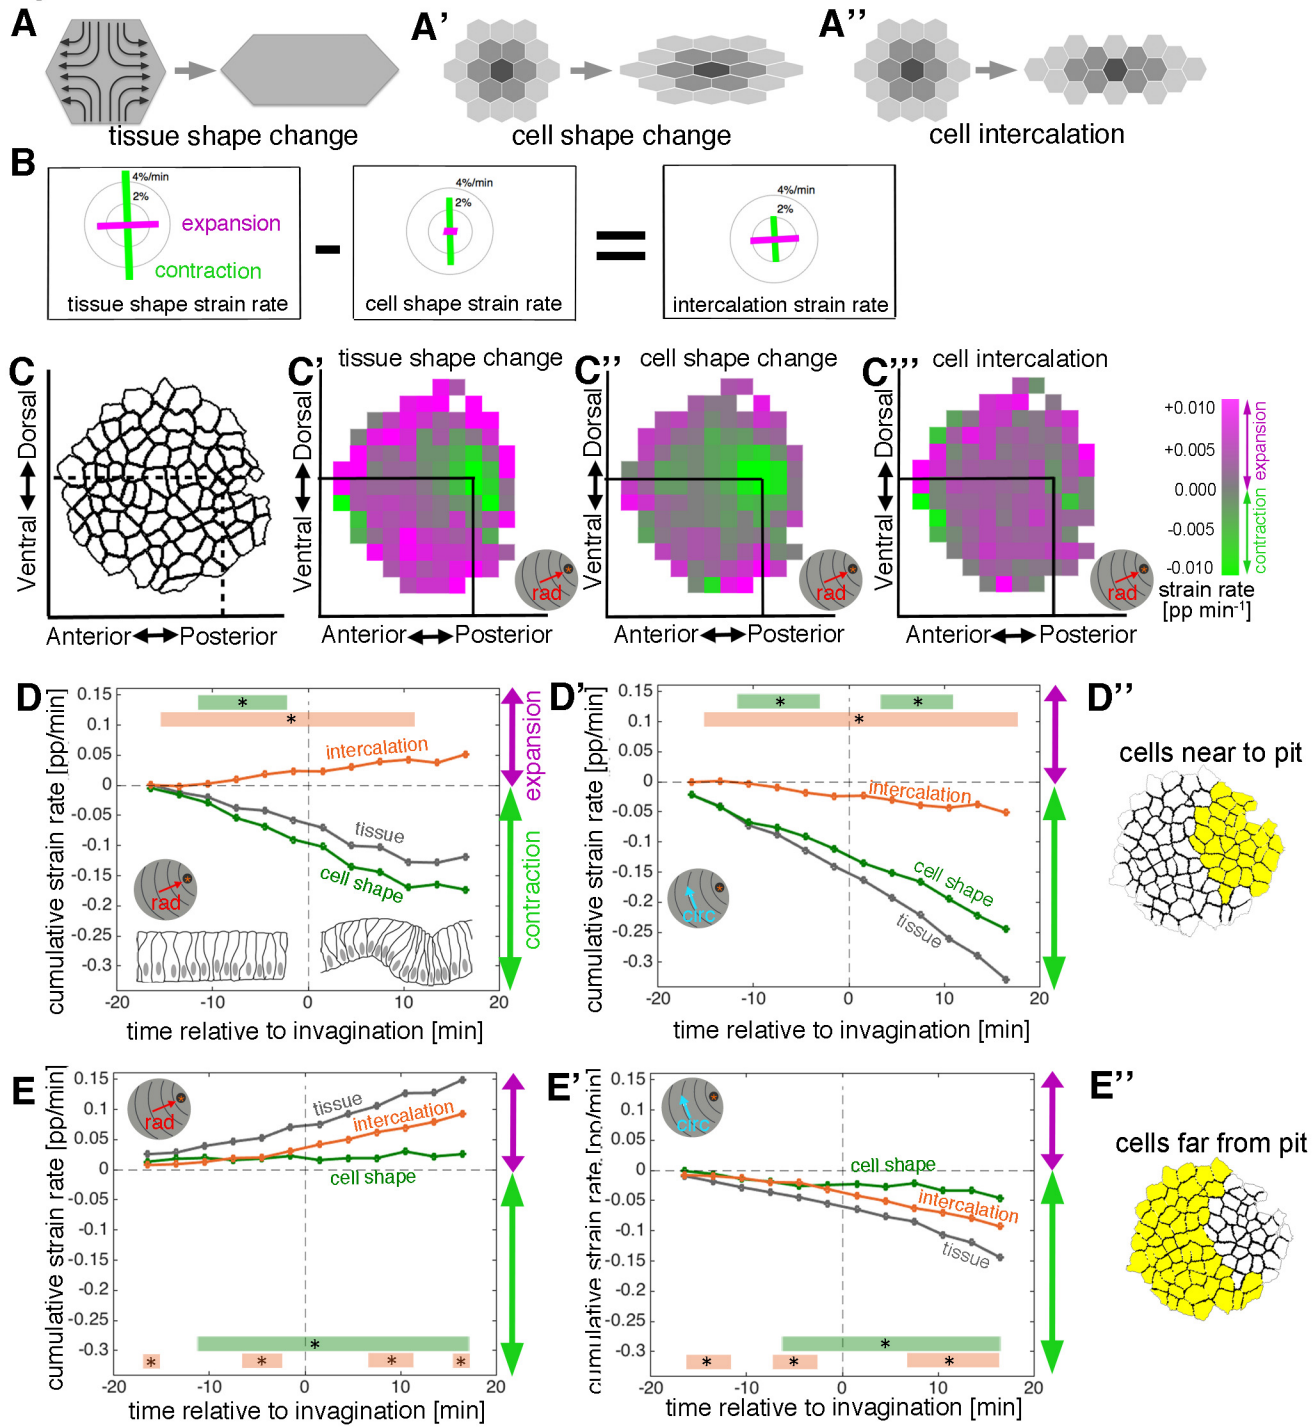

1 **Figure 2. Apical strain rate analysis of early events during salivary gland**  
2 **placode invagination.**

3 **A-A''** During early salivary gland placode development the change in tissue shape (**A**)  
4 can be accounted for by cell shape changes (**A'**), cell intercalation (**A''**) or any  
5 combination of the two. During this phase, cell division and gain or loss of cells from  
6 the epithelium (other than cells invaginating into the pit), do not occur.

7 **B** For small domains of a focal cell and its immediate neighbours, tissue shape  
8 change is the sum of two additive contributions, cell shape change and cell  
9 intercalation (Blanchard et al., 2009). Both tissue shape change and cell shape  
10 change can be measured directly from the segmented and tracked time-lapse movies,  
11 so the amount of cell intercalation can be deduced.

12 **C-C'''** Spatial depiction of the strain rate analysis covering 18 min prior to 18 min  
13 post commencement of tissue bending. Mapped onto the shape of the placode (**C**)  
14 the strain rate contribution towards the pit ('rad') is shown quantified from data from 9  
15 embryos (see Suppl. Fig.2). **C'** Tissue constriction (green) dominates near the pit,  
16 with expansion (magenta) towards the periphery. The tissue constriction near the pit  
17 is mostly due to cell constriction near the pit (**C''**), whereas the tissue expansion is  
18 contributed to by both cell expansion and cell intercalation far from the pit (magenta  
19 in **C''** and **C'''**).

20 **D-E''** Regional breakdown of time-resolved average strain rate. In the area near the  
21 pit (**D''**) tissue constriction dominates (grey curves in **D** and **D'**) and is due to  
22 isotropic constriction at the cell level (green curves in **D** and **D'**), whilst intercalation  
23 only plays a minor role in this region (orange curves in **D**, **D'**). Far from the pit (**E''**),  
24 the tissue elongates towards the pit (**E**, grey curve), with a corresponding contraction  
25 circumferentially (**E'**, grey curve), and this is predominantly due to cell intercalation  
26 (orange curves in **E** and **E'**). Statistical significance based on a mixed-effects model  
27 and a  $p < 0.05$  threshold (calculated for instantaneous strain rates [see Suppl.Fig.2]),

- 1 is indicated by shaded boxes at the top of each panel: tissue vs cell shape (green)
- 2 and tissue vs intercalation (orange). See also Suppl. Movie 2.
- 3

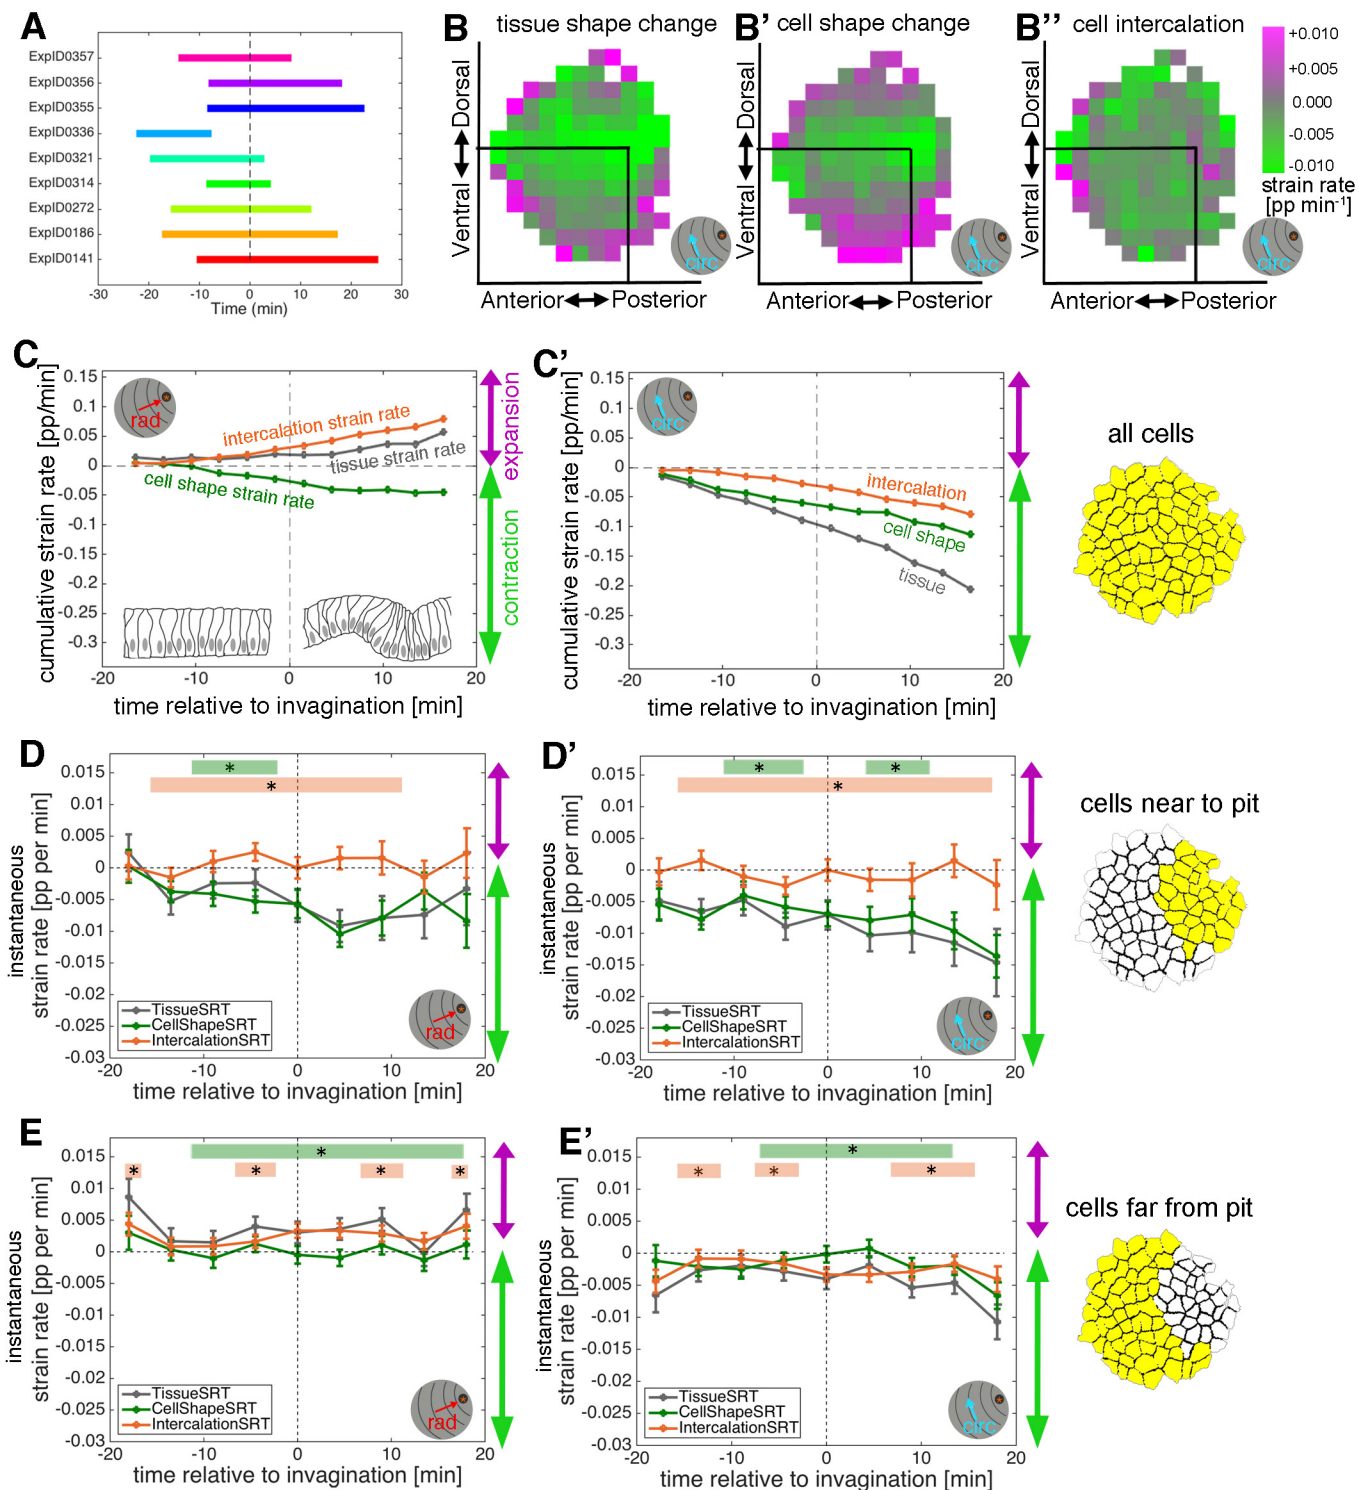

1 **Suppl. Figure 2. Apical strain rate analysis of early events during salivary gland**  
2 **placode invagination.**

3 **A** Schematic of time window covered by the time-lapse movies analysed for the  
4 apical strain rate calculations.

5 **B-B''** Spatial summary of strain rates projected onto the circumferential orientation,  
6 covering 18 min prior to 18 min post commencement of tissue bending.

7 **C-C'** Average strain rates of all pooled placodal cells. Overall, the tissue elongates a  
8 little radially towards the pit whilst contracting circumferentially (grey curves). Cell  
9 shapes constrict nearly isotropically (green curves), with intercalation extending the  
10 tissue towards the pit and contracting it circumferentially (orange curves).

11 **D-E'** Instantaneous strain rates corresponding to the cumulative plots in Fig. 2 D-E''.  
12 Error bars show an indicative confidence interval of the mean, calculated as the sum  
13 of the variance of the embryo means and the mean of within-embryo variance.

14 Statistical significance based on a mixed-effects model and a  $p < 0.05$  threshold is  
15 indicated by shaded boxes at the top of each panel (see Methods for details of  
16 statistics): tissue vs cell shape (green) and tissue vs intercalation (orange). The same  
17 conventions for displaying confidence intervals and statistical significance are used in  
18 all subsequent instantaneous strain rate plots.

19

20

Figure 3. Sanchez et al.

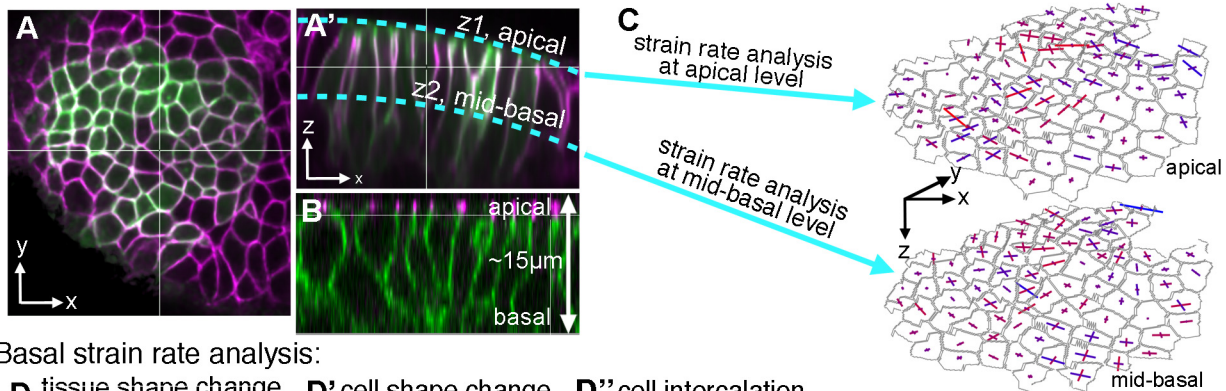

Basal strain rate analysis:

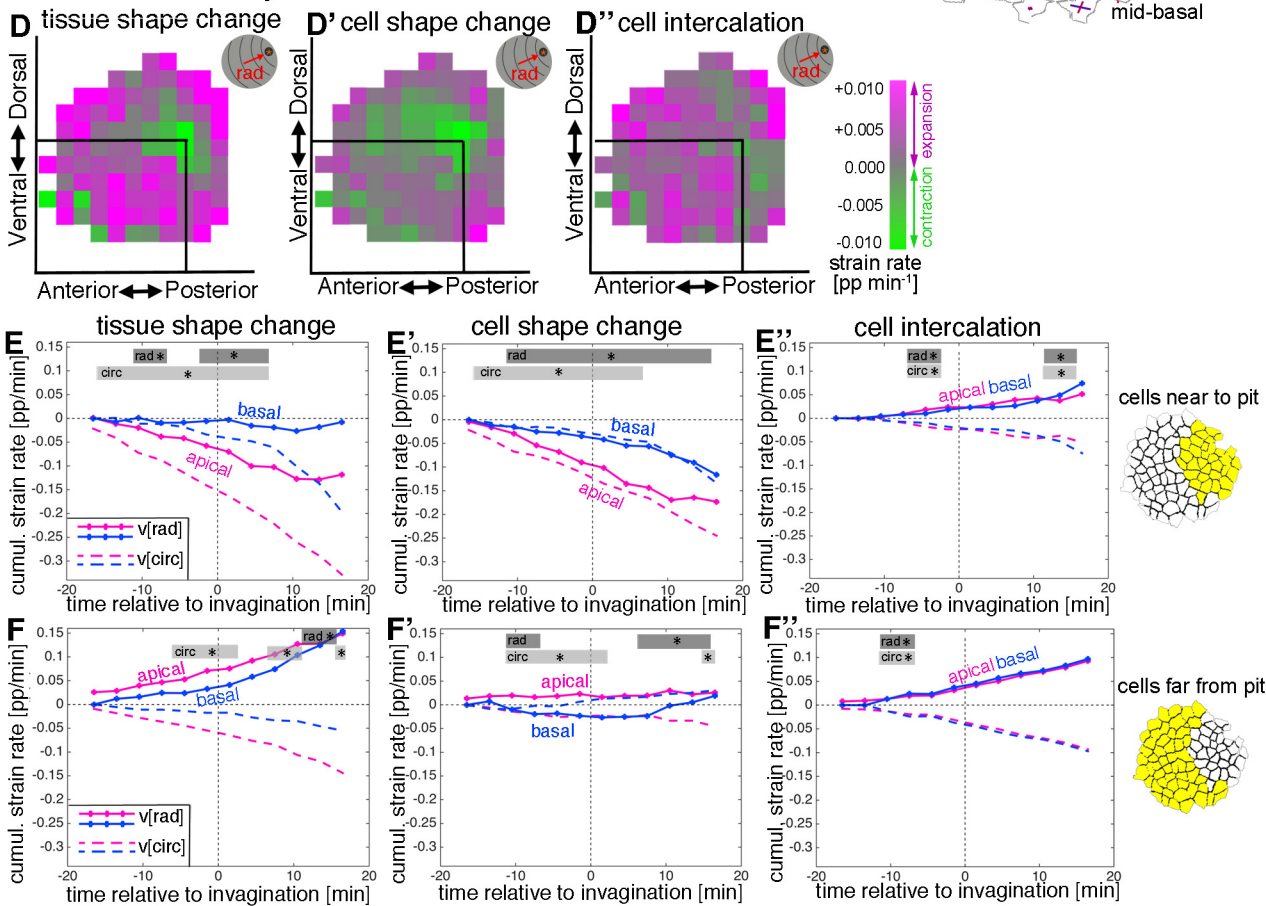



1 **Figure 3. Strain rate analysis of early tubulogenesis in 3D.**

2 **A-B** Epithelial cells of the placode are about 2-5 $\mu$ m in apical diameter but extend  
3 about 15 $\mu$ m into the embryo along their apical-basal axis. To assess behaviour of the  
4 tissue and cells at depth, we analysed a mid-basal level, about 8 $\mu$ m basal to the  
5 apical surface.

6 **C** We segmented and tracked cells at a depth of ~8 $\mu$ m, and repeated the strain rate  
7 analysis at this mid-basal level to compare with apical.

8 **D-D''** Spatial summary of the basal strain rates (calculated from -15 to +18 min,  
9 radial contribution, "rad"). Constriction still dominates the pit region at the tissue level  
10 (**D**), due to cell constriction (**D'**), with strong expansion towards the pit everywhere  
11 else, predominantly due to cell intercalation (**D''**).

12 **E-F''** Comparison of apical (pink, as shown in Figure 2) and basal (blue) strain rates,  
13 for tissue change (**E,F**), cell shape changes (**E', F'**) and cell intercalation (**E'', F''**),  
14 near the pit (**E-E''**) and far from the pit (**F-F''**). Note how cell shape changes apical  
15 versus basal near the pit suggest progressive cell wedging as apices contract  
16 isotropically more rapidly than basally (**E'**), and how cell intercalation across the  
17 tissue is highly coordinated between events apically and basally (**E'', F''**). Statistical  
18 significance based on a mixed-effects model and a  $p < 0.05$  threshold (deduced from  
19 instantaneous strain rates [see Suppl.Figs 2 and 3]), is indicated by shaded boxes at  
20 the top of each panel: apical 'rad' vs basal 'rad' (dark grey) and apical 'circ' vs basal  
21 'circ' (light grey).

22

23

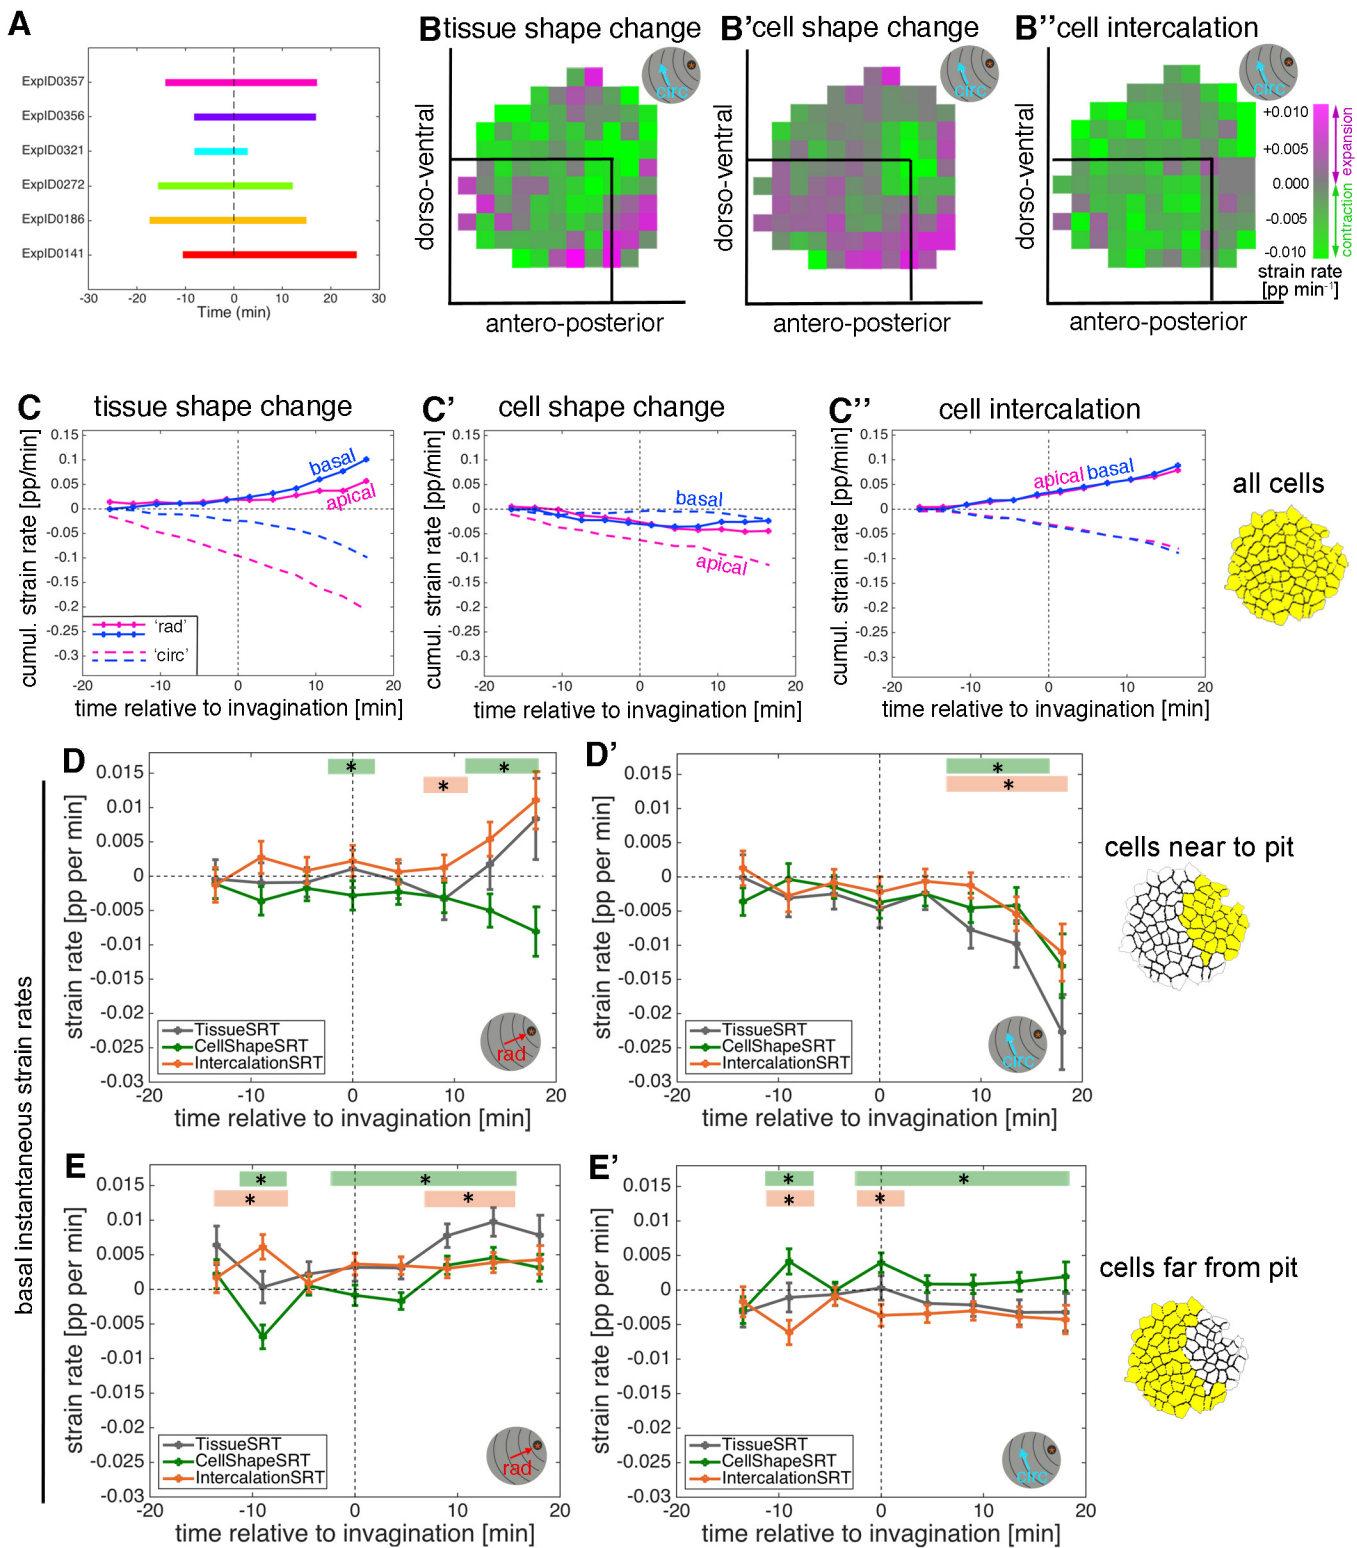

1 **Suppl. Figure 3. Strain rate analysis of early tubulogenesis in 3D.**

2 **A** Schematic of time window covered by the time-lapse movies analysed for the  
3 basal strain rate calculations.

4 **B-B''** Spatial summary of basal strain rates projected onto the circumferential  
5 orientation, covering 15 min prior to 18 min post commencement of tissue bending.

6 **C-C'** Comparison of the average basal and apical strain rates of all pooled placodal  
7 cells. Overall, basally the tissue elongates towards the pit whilst contracting  
8 circumferentially, in a more isotropic fashion than apical. Basally, cell shape change  
9 is weakly contractile radially, like apical, while it is near zero circumferentially, unlike  
10 apical (**C'**), with intercalation extending the tissue towards the pit and contracting it  
11 circumferentially almost identically in apical and basal (**C''**).

12 **D-E'** Instantaneous basal strain rates corresponding to the cumulative plots in Fig. 3  
13 D-E''. Error bars depict within-embryo variation of 6 movies. Significance using a  
14 mixed-effects model of  $p < 0.05$  is indicated by shaded boxes at the top of each panel:  
15 tissue vs cell shape (green) and tissue vs intercalation (orange), see Methods for  
16 details of statistics.

17

18

19

Figure 4. Sanchez et al.

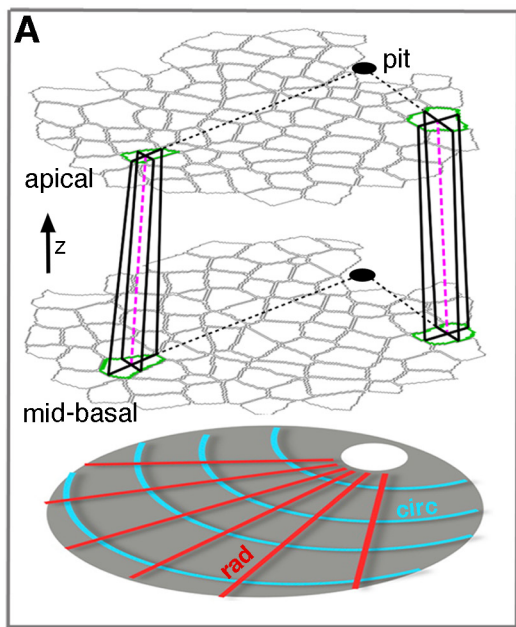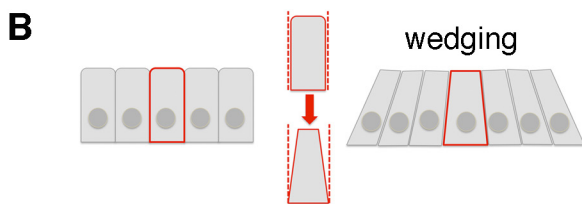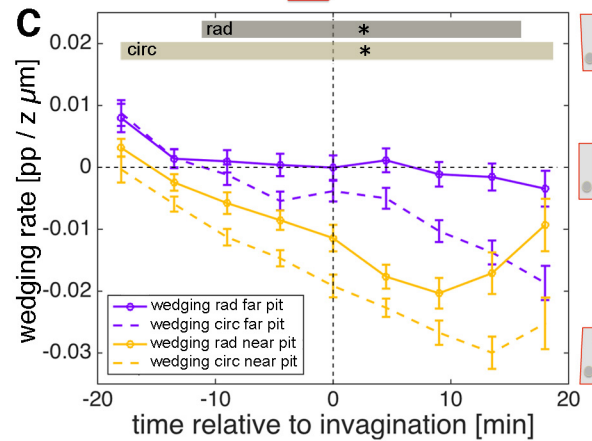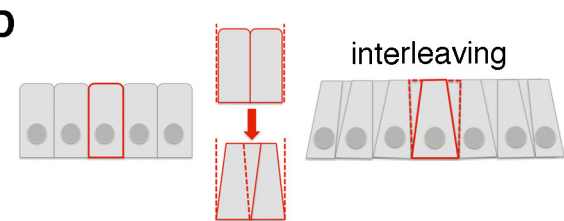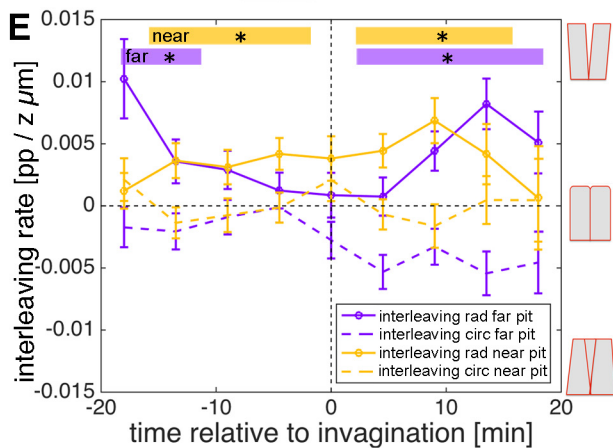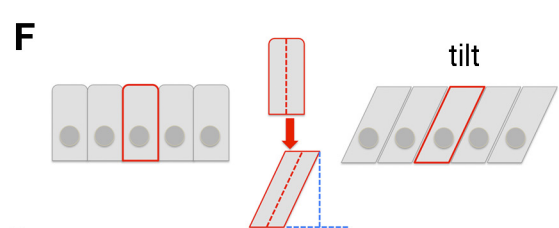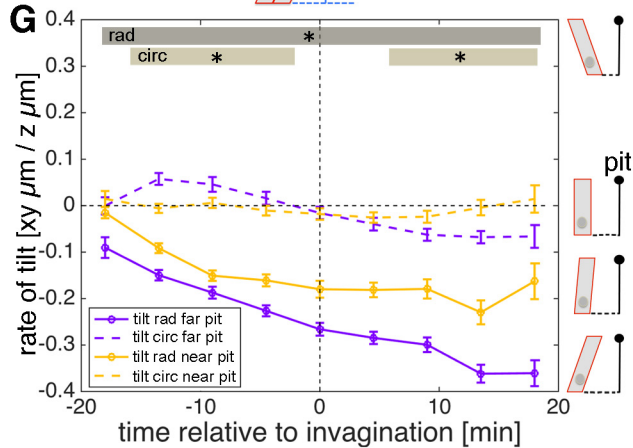

1 **Figure 4. 3D cell behaviours during early tube budding.**

2 **A** Calculating 3D tissue metrics using tracked cells at apical and mid-basal levels  
3 through the salivary placode. Though for simplicity only two matched cells are shown  
4 here (green outlines), all cells were matched accurately between levels (see text and  
5 Suppl. Movie 3). Small domains of a focal cell and its immediate neighbours were  
6 used to calculate local rates of wedging, interleaving and tilt (from cell 'in-lines', pink  
7 dashed lines) using z-strain rate methods (see text). Measures were projected onto  
8 the pit-centred radial (dotted black lines) and circumferential axes. In this tilted side-  
9 view cartoon, the z distance between apical and mid-basal levels has been  
10 exaggerated.

11 **B** Schematic of cell wedging.

12 **C** Cell wedging across is patterned the placode, increasing most strongly in cells  
13 near to the pit, in accordance with the isotropic apical constriction observed here  
14 (orange lines). Away from the pit, wedging contributes mainly in the circumferential  
15 direction (purple dashed line).

16 **D** Schematic of cell interleaving.

17 **E** Radial cell interleaving (solid line) is always more positive than circumferential  
18 interleaving (dashed lines), often significantly so. Interleaving contributes to a radial  
19 expansion apically and a concomitant circumferential contraction.

20 **F** Schematic of cell tilt.

21 **G** Cell tilt increased continuously in the radial direction (solid lines) apically towards  
22 the pit over the period of our analysis. A stronger rate of tilt was observed for the  
23 cells further from the pit (purple solid line), which is expected from the radial wedging  
24 seen near the pit.

25 **C,E,G** Error bars represent within-embryo variation of 5 movies and significance at  
26  $p < 0.05$  using a mixed-effect model is depicted as shaded boxes at the top of the  
27 panel: **C** wedging in radial orientation, near to vs far from pit (dark grey, 'rad') and  
28 wedging in circumferential orientation, near to vs far from pit (light grey, 'circ'). **E**

- 1 Interleaving near to the pit, radial vs circumferential (orange, 'near') and interleaving
- 2 far from the pit, radial vs circumferential (purple, 'far'). **G** Tilt in radial orientation, near
- 3 to vs far from pit (dark grey, 'rad') and tilt in circumferential orientation, near to vs far
- 4 from pit (light grey, 'circ').
- 5

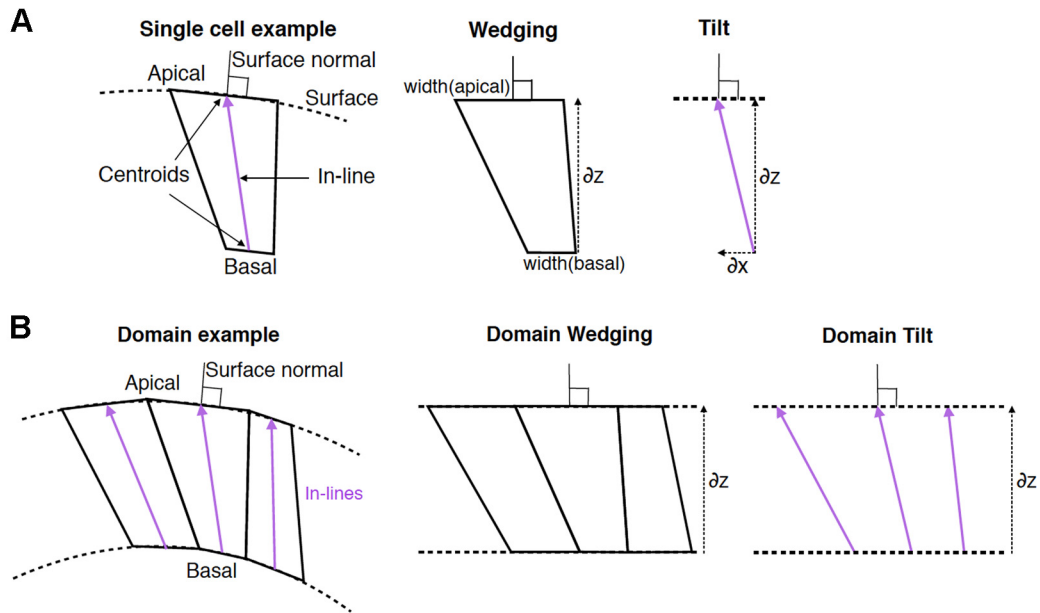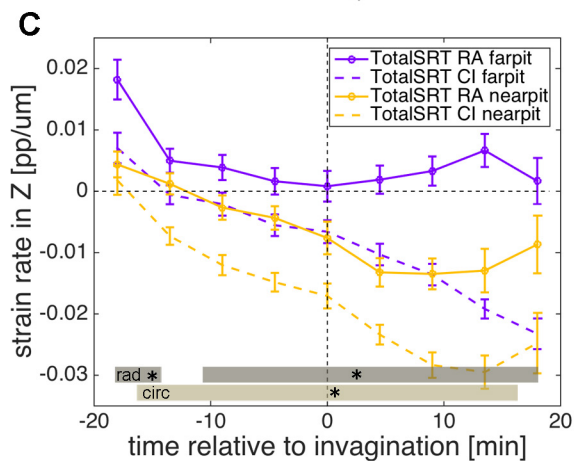

1 **Suppl. Figure 4. 3D cell behaviours during early tube budding.**

2 **A,B** Schematics illustrating wedging and tilt definitions in the context of a single cell

3 **(A)** and a domain of cells **(B)**.

4 **C** Total strain rate in z, representing the sum of the wedging and interleaving strain

5 rates shown in Figure 4C, E. Error bars represent within-embryo variation of 5

6 movies and significance at  $p < 0.05$  using a mixed-effect model is depicted as shaded

7 boxes at the bottom of the panel: total strain rate in z in radial orientation, near to vs

8 far from pit (dark grey, 'rad') and total strain rate in z in circumferential orientation,

9 near to vs far from pit (light grey, 'circ').

10

11

12



Figure 5. Sanchez et al.

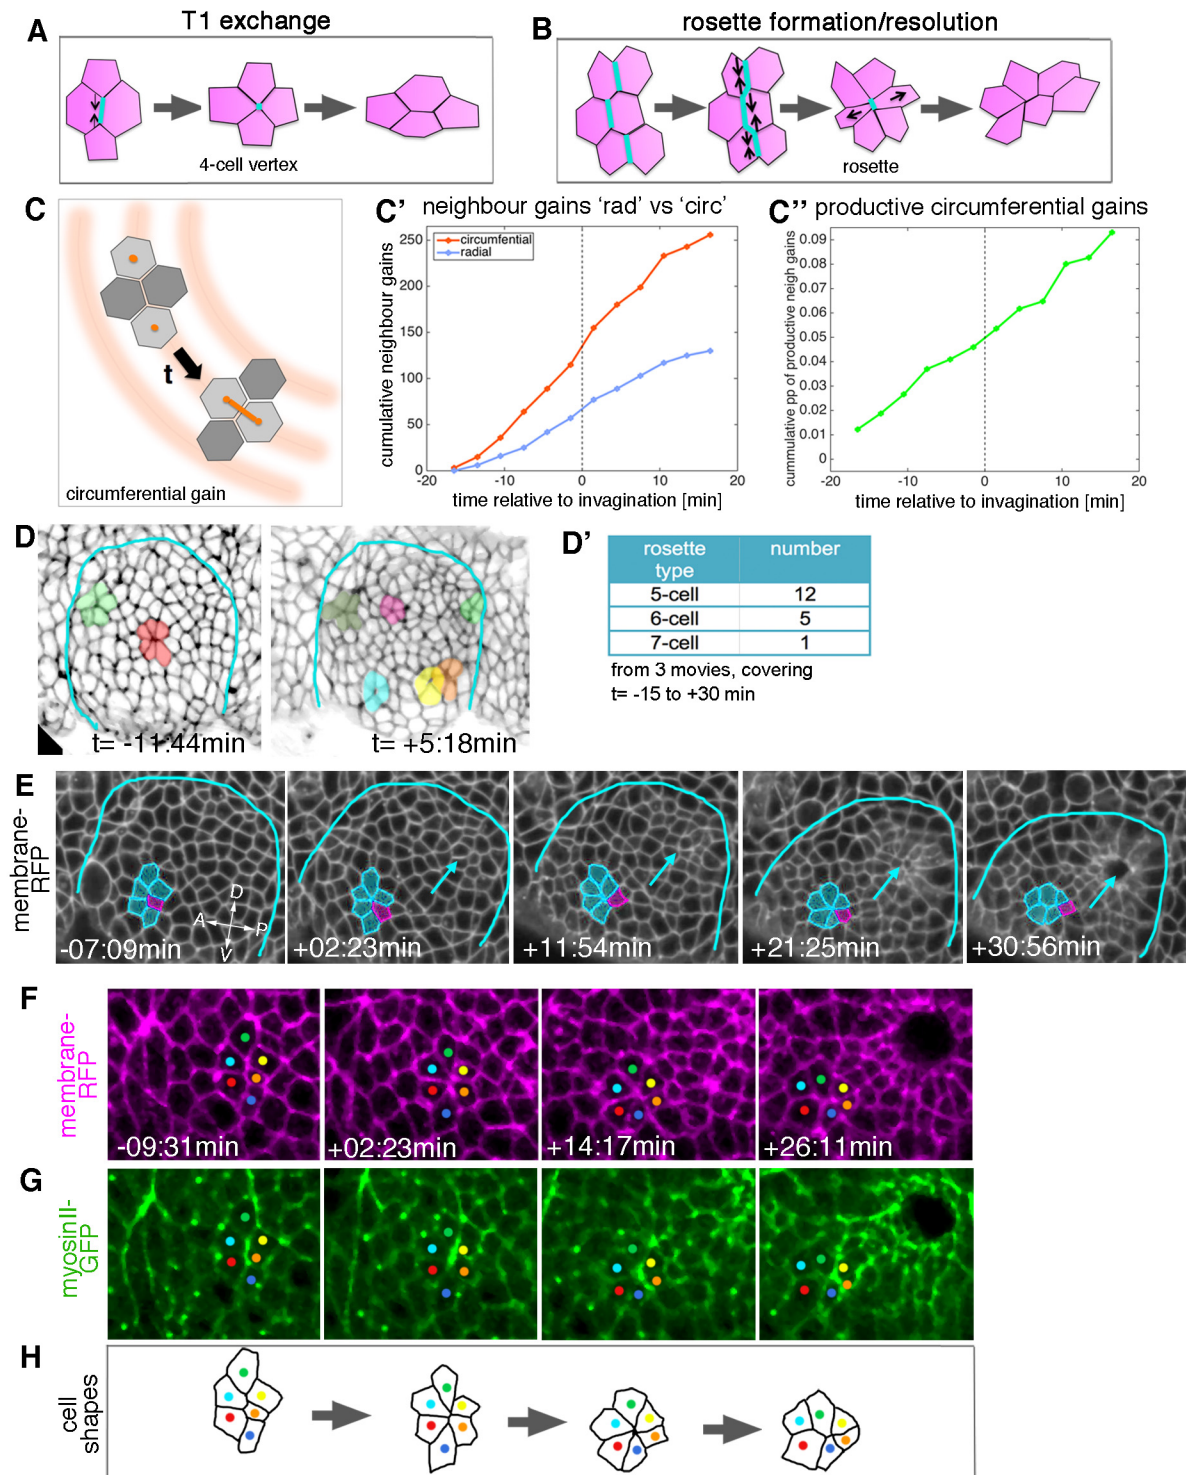

1 **Figure 5. Cell intercalation during tube formation combines T1 exchanges and**  
2 **rosette-formation/resolution.**

3 **A,B** Depending on the number of cells involved, intercalation can proceed through  
4 formation and resolution of a 4-cell vertex, a so-called T1-exchange (**A**), or through  
5 formation and resolution of a rosette-like structure than can involve 5-10 or more  
6 cells (**B**).

7 **C-C''** Quantification of neighbour gains as a measure of T1 and intercalation events,  
8 with an example of a circumferential neighbour gain (leading to radial tissue  
9 expansion) shown in (**C**). **C'** Circumferential neighbour gains dominate over radial  
10 neighbour gains. **C''** Rate of productive gains, defined as the amount of  
11 circumferential neighbour gains leading to radial tissue elongation and expressed as  
12 a proportion (pp) of cell-cell interfaces tracked at each time point. Data are pooled  
13 from 7 embryo movies.

14 **D** Stills of two time-lapse movies used for the strain rate analysis, illustrating the  
15 appearance of rosette structures prior to (t= -11:44 min) and after (t= +5:18 min)  
16 tissue bending. **D'** The majority of rosettes observed in the salivary gland placode  
17 consist of 5 – 6 cells. Data are pooled from 3 embryo movies.

18 **E-G** Stills of a time-lapse movie of an example of rosette formation-resolution. **E** The  
19 cluster of cells contracts along the circumferential direction of the placode, and  
20 resolution from the 6-cell-vertex is oriented towards the pit. Label is *Ubi-RFP-CAAX*.

21 **F,G** The same rosette as in **E** in close-up, showing *Ubi-RFP-CAAX* to label  
22 membranes in magenta (**F**) and myosin II-GFP (*sqhGFP*) in green (**G**). Note the  
23 prominent but transient myosin accumulation at the centre of the rosette-forming  
24 group of cells. **H** is a schematic of the rosette formation-resolution analysed in **E-G**.

25 See also Suppl.Movie 4.

26

Figure 6. Sanchez et al.

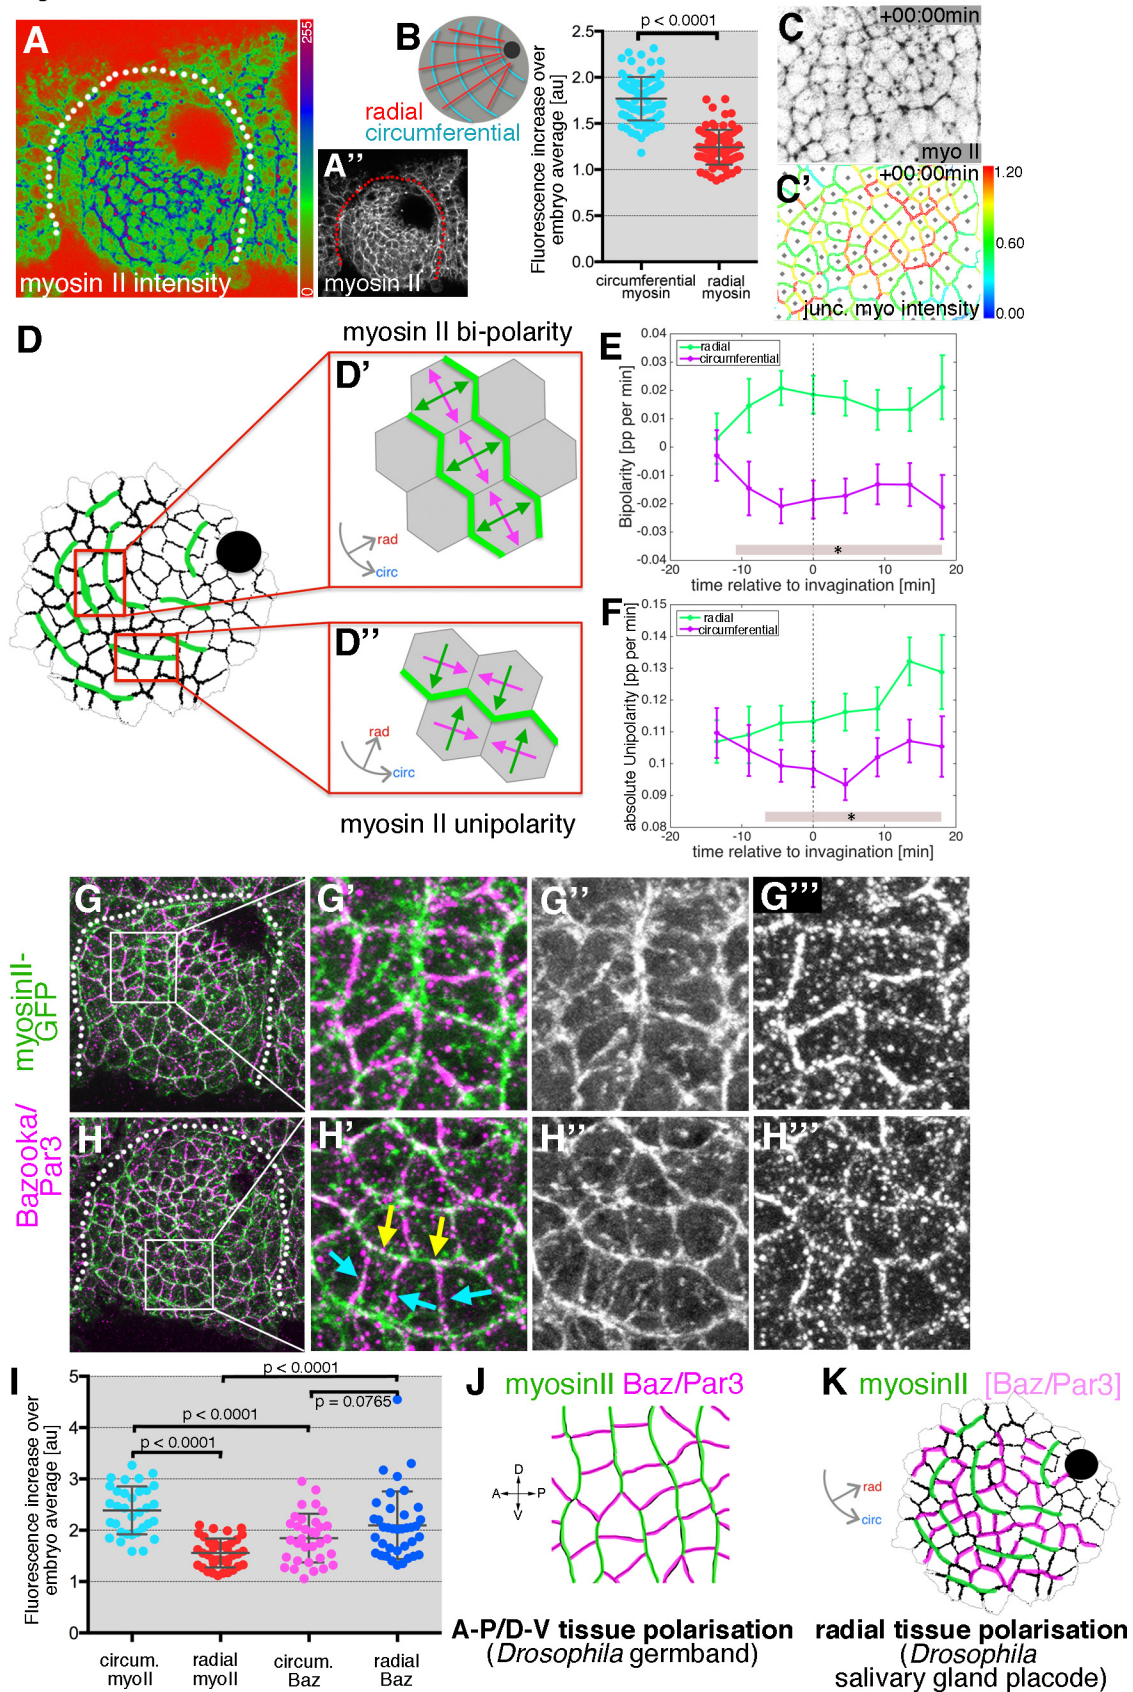

1 **Figure 6. Junctional myosin II shows a strong circumferential polarisation**  
2 **during tube formation.**

3 **A-B** Example of junctional myosin II intensity, visualised using *sqh*[AX3]; *sqhGFP* in  
4 fixed embryos; **A** shows a heat map of intensity. **B** Quantification of apical junctional  
5 myosin polarisation as fluorescence increase in junctions over embryo average (5  
6 placodes from 5 embryos, 83 circumferential junctions versus 83 radial junctions;  
7 significance calculated using unpaired t-test).

8 **C,C'** Myosin II enrichment was quantified from segmented and tracked time-lapse  
9 movies. **(C)** depicts the *sqhGFP* signal from a single time point of a movie, **(C')**  
10 shows the calculated junctional myosin II intensity. See also Suppl. Movies 5 and 6.

11 **D-F** Myosin enrichment at junctions can occur in two flavours: **(D',E)** Myosin II bi-  
12 polarity is defined as myosin II enrichment at two parallel oriented junctions of a  
13 single cell **(D')**. Radial bi-polarity, indicating myosin II enrichment at circumferentially  
14 oriented parallel junctions (green vectors in **D'** pointing at myosin II enrichment),  
15 increases between -15 min to +18min **(E, green curve)**. **(D'',F)** Myosin II unipolarity is  
16 defined as myosin II enrichment selectively on side of a cell **(D'')**. Radial unipolarity,  
17 indicating enrichment at circumferentially oriented junctions (green vectors in **D''**  
18 pointing at myosin II enrichment), increases between -15 min to +18min **(F, green**  
19 **curve)**, whereas circumferential unipolarity, indicating enrichment at radial junctions  
20 does not increase **(F, magenta curve)**. **E,F** Error bars represent within-embryo  
21 variation of 4 movies, and significance between radial and circumferential bi- and uni-  
22 polarity at  $p < 0.05$  using a mixed-effect model is depicted as shaded boxes at the  
23 bottom of panels E and F. See also Suppl. Movie 6.

24 **G-H'''** Examples of myosin II and Bazooka/Par3 polarisation in fixed embryos, two  
25 different regions of two placodes are shown. Note the complementary localisation of  
26 myosin II (green) and Bazooka (magenta).

27 **I** Quantification of myosin II and Bazooka/Par3 polarisation in areas of strong  
28 junctional myosin II enrichment at circumferential junctions as shown in **G'** and **H'**.

1 Both circumferential (yellow arrows in **H'**) and radial (turquoise arrows in **H'**)  
2 fluorescence in crease over embryo average were quantified for myosin II and  
3 Bazooka in the same junctions (from 5 embryos; mean and SEM are shown; paired t-  
4 test for comparison in the same junctions, unpaired t-tests for comparison of  
5 circumferential myo vs radial myo and circumferential Baz vs radial Baz; N= 33  
6 circumferential junctions and N=38 radial junctions across 5 embryos).

7 **J,K** In contrast to the well-documented A-P/D-V polarity of cells in the *Drosophila*  
8 germband during elongation in gastrulation (**J**), the salivary gland placode appears to  
9 show a radial tissue polarity, with a radial-circumferential molecular pattern imprinted  
10 onto it that instructs the morphogenesis (**K**).

11  
12  
13

Figure 7. Sanchez et al.

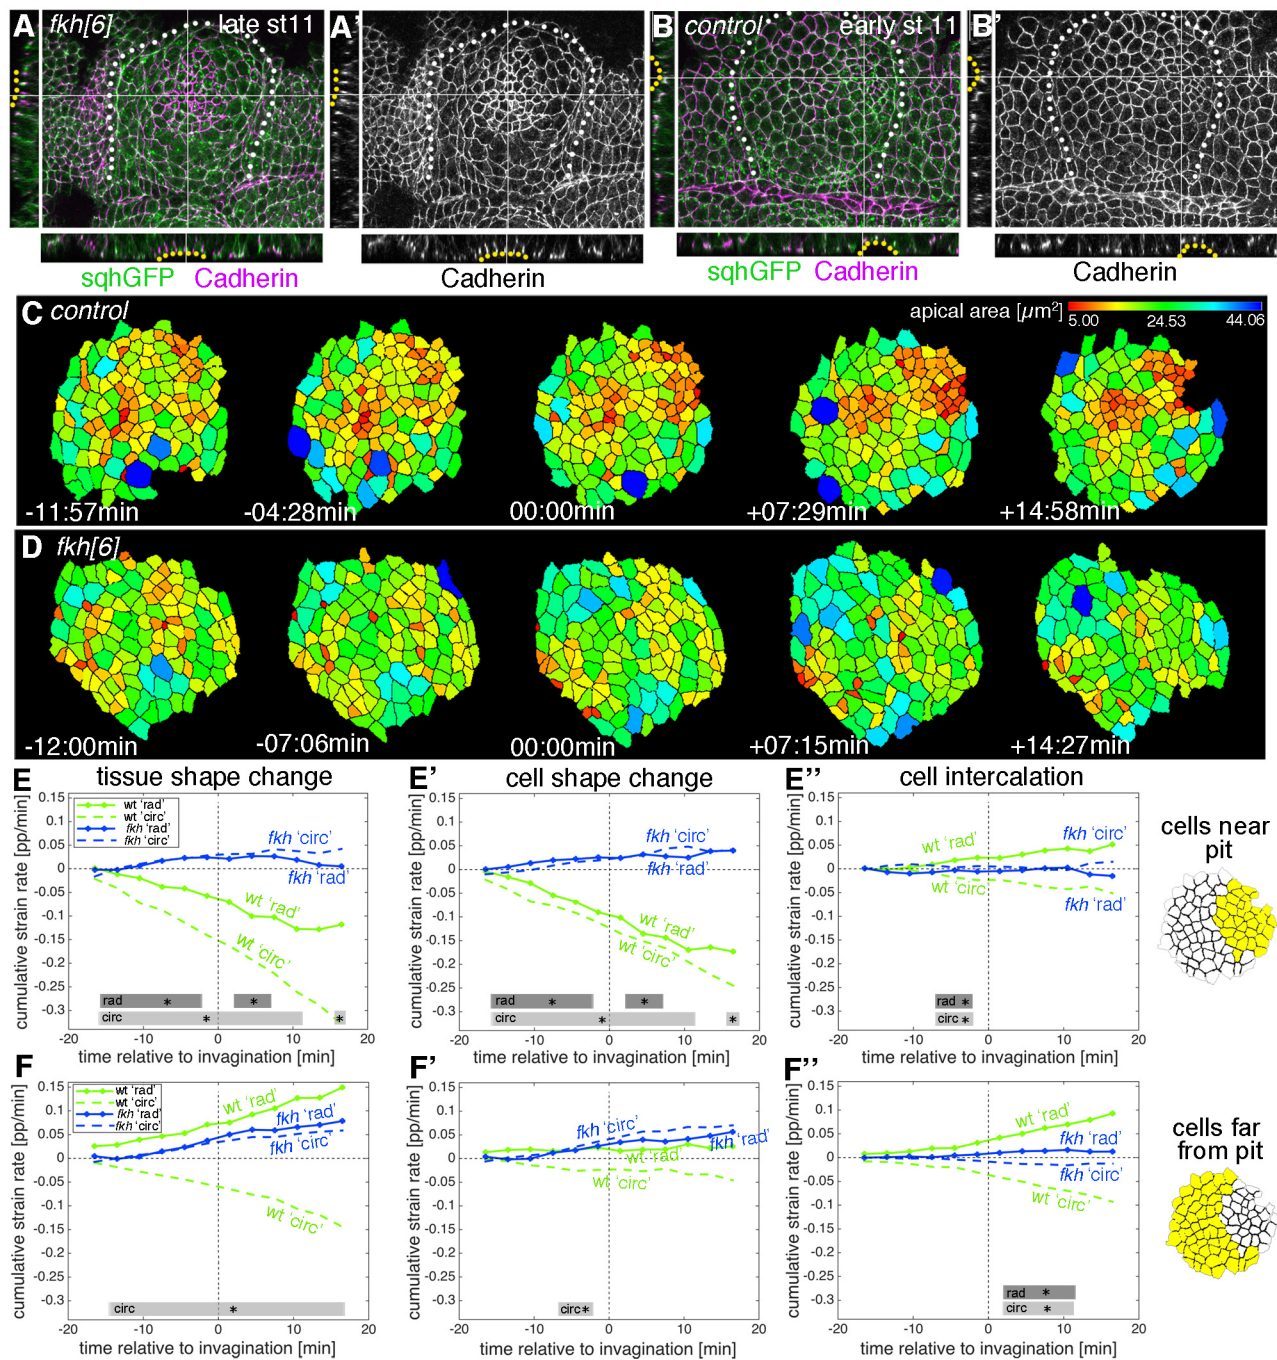

1 **Figure 7. Loss of radially polarisation of cell behaviours in salivary gland**  
2 **placodes lacking *Fkh*.**

3 **A-B'** Examples of *fkh* mutant and wild-type placodes illustrating the lack of pit  
4 formation. A control placode at early stage 11 shows clear constriction and pit  
5 formation in the dorsal-posterior corner (yellow dotted line in cross-sections in **B, B'**),  
6 whereas even at late stage 11 a *fkh* mutant placode (beyond the time frame of our  
7 quantitative analysis) does not show a pit in the dorsal-posterior corner, instead a  
8 shallow central depression forms with some constricted central apices (yellow dotted  
9 line in cross-sections in **A, A'**). Myosin II (sqhGFP) is in green and DE-Cadherin in  
10 magenta, white dotted lines in main panels outline the placode boundary.

11 **C,D** Stills of segmented and tracked time lapse movies for control (**C**) and *fkh[6]*  
12 mutant (**D**) placodes, apical cell outlines are shown and colour-coded by cell area.  
13 Note the lack of contraction at the tissue and cell level in the *fkh[6]* mutant.

14 **E-F''** Apical strain rate analysis of *fkh* mutant placodes (from 5 movies) in  
15 comparison to the analysis of wild-type embryos (as shown in Figure 2). Over the first  
16 36 min of tube budding centred around the first appearance of tissue-bending in the  
17 wild-type and an equivalent time point in the *fkh* mutants, the *fkh* mutant placodes  
18 show only a slight expansion at the tissue level in the cells far from the predicted pit  
19 position (**F**) due to cell shape changes (**F'**) with very little intercalation contributing to  
20 the change (**E''**, **F''**). Statistical significance based on a mixed-effects model and a  
21  $p < 0.05$  threshold (calculated for instantaneous strain rates [see Suppl.Fig.2 and 7]),  
22 is indicated by shaded boxes at the top of each panel: wt 'rad' vs *fkh* 'rad' (dark grey)  
23 and wt 'circ' vs *fkh* 'circ' (light grey).

24

25

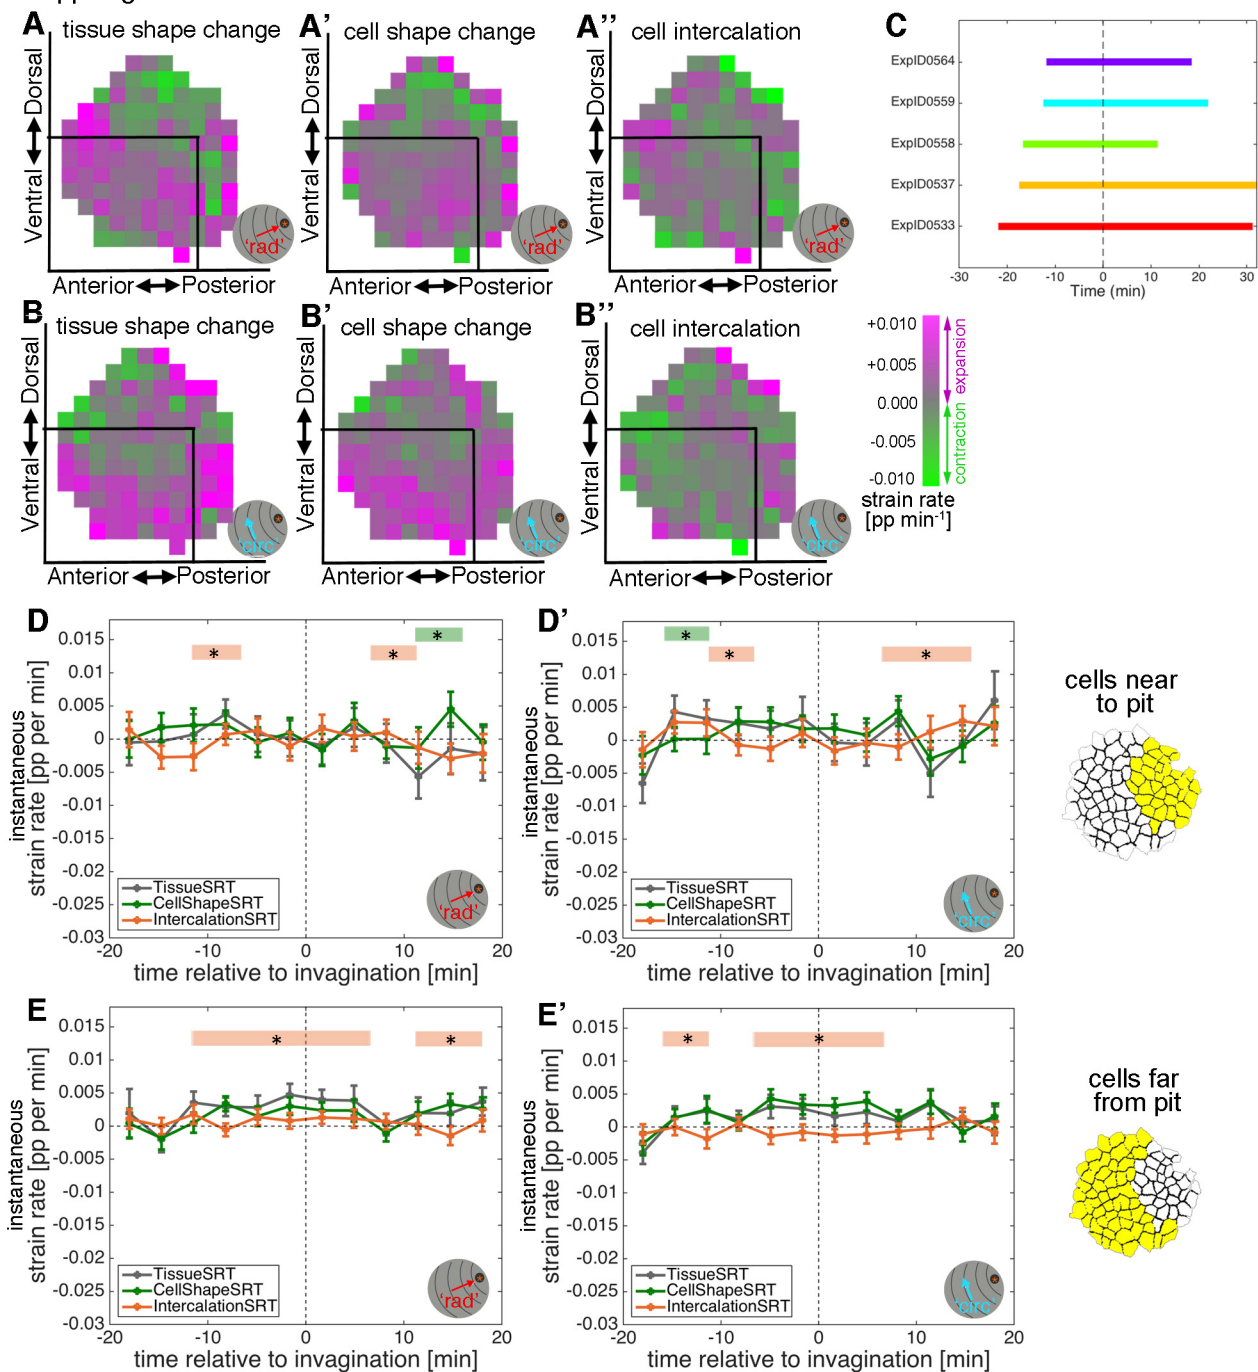



1 **Suppl. Figure 7. Loss of radially polarisation of cell behaviours in salivary**

2 **gland placodes lacking *Fkh*.**

3 **A-B''** Spatial summary of average apical strain rates in *fkh[6]* mutants covering 15  
4 min prior to 18 min post commencement of tissue bending, showing the radial (**A-A''**)  
5 as well as circumferential (**B-B''**) contributions.

6 **C** Schematic of time window covered by the time-lapse movies analysed for the  
7 apical strain rate calculations in *fkh[6]* mutant embryos.

8 **D-E'** Instantaneous apical strain rates in *fkh[6]* mutants corresponding to the  
9 cumulative plots in Fig. 7 E-F''. Error bars depict within-embryo variation of 5 movies.

10 Significance using a mixed-effects model of  $p < 0.05$  is indicated by shaded boxes at  
11 the top of each panel: tissue vs cell shape (green) and tissue vs intercalation  
12 (orange), see Methods for details of statistics.

13

14

Figure 8. Sanchez et al.

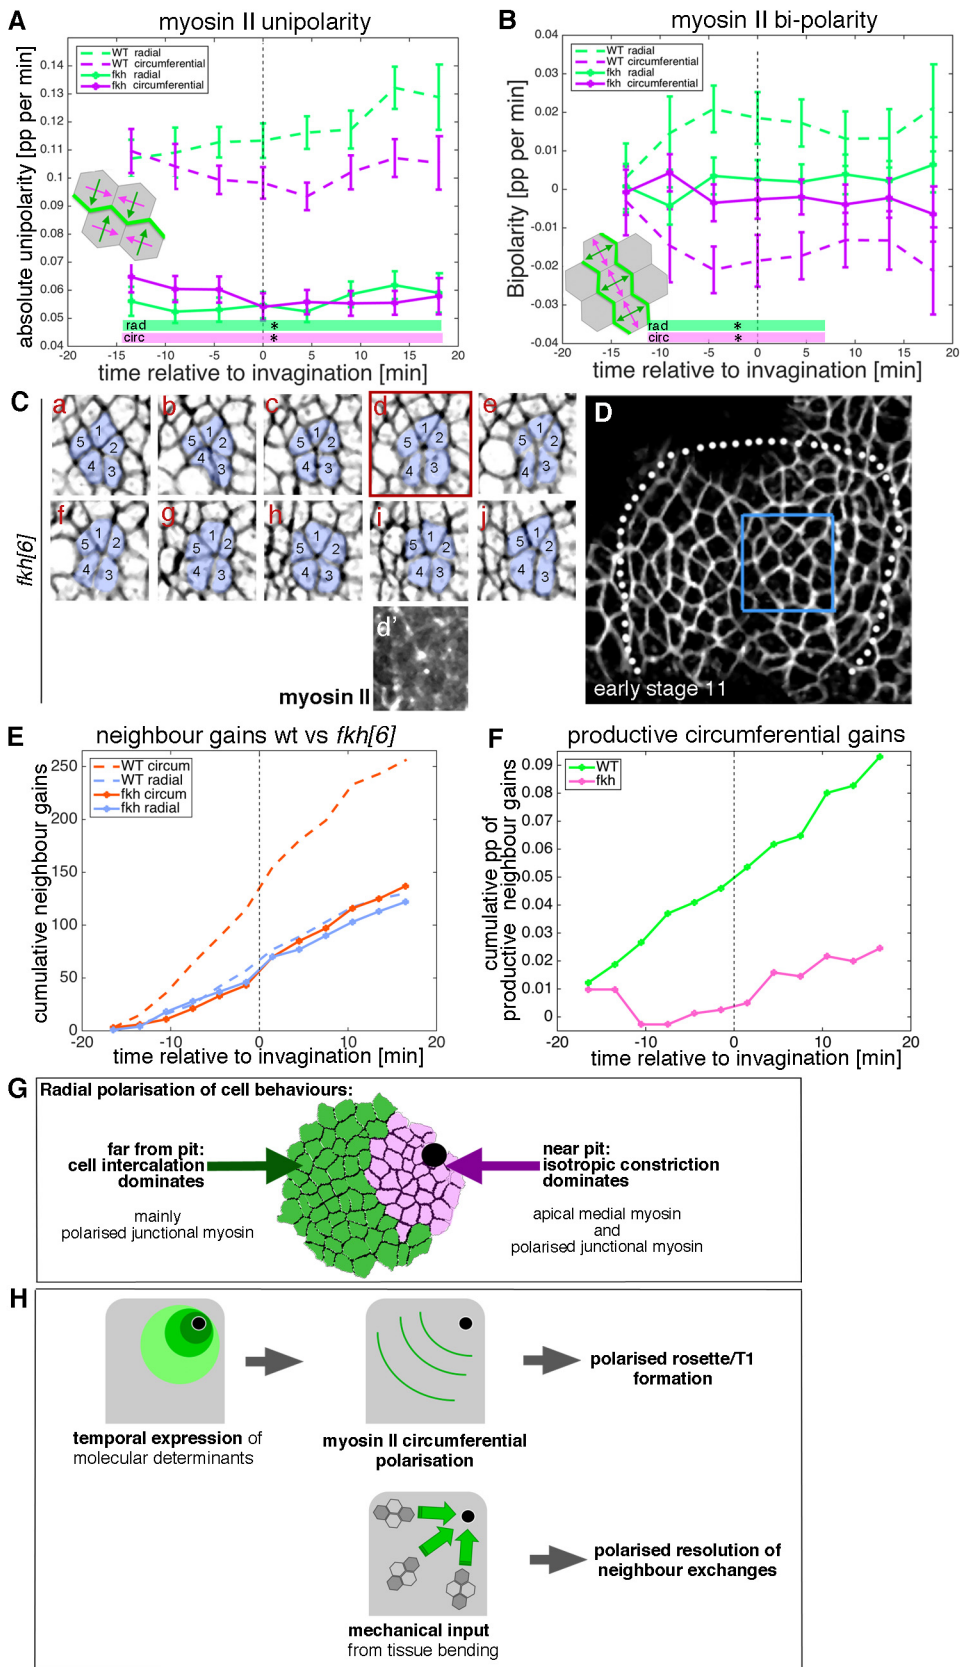

1 **Figure 8. Analysis of intercalation behaviour in *fkh* mutants.**

2 **A,B** Analysis of myosin II unipolarity (**A**) and bi-polarity (**B**) in *fkh[6]* mutant placodes  
3 compared to wild-type (as shown in Figure 6, see also Suppl. Movie 6 and 7). Overall  
4 myosin II levels in *fkh[6]* mutant placodes are lower (not shown) and both unipolarity  
5 and bi-polarity are decreased, with bi-polarity near zero (**B**, solid curves). Error bars  
6 show intra-embryo variation of 5 embryo movies for *fkh[6]* and 4 embryo movies for  
7 wt. Statistical significance at  $p < 0.05$  using a mixed-effect model is indicated as  
8 shaded boxed at the bottom of the panels: wt vs *fkh[6]* for the radial  
9 vector/circumferential enrichment (green, 'rad') and wt vs *fkh* for the circumferential  
10 vector/radial enrichment (purple, 'circ').

11 **C-F** Intercalation and neighbour exchanges still occur in *fkh[6]* mutant placodes. **C**  
12 Still pictures from a tracked and segmented movie of a *fkh[6]* mutant placode (labelled  
13 with membrane-RFP), frames (labelled **a-j**) are 1:55 min apart, the full placode view  
14 in **D** is from time point **a**, **d'** shows the myosin accumulation at the centre of the  
15 rosette structure observed in **d**. **E** In comparison to wt where circumferential  
16 neighbour gains dominate over radial ones (dashed lines), in the *fkh[6]* mutant  
17 placodes both occur with equal frequency (solid lines). This leads to nearly no  
18 productive neighbour gains in the mutant, significantly fewer than in the wt (**F**;  
19 Kolmogorov-Smirnov two sample test  $D=0.5833$ ,  $P=0.0191$ ).

20 **G** The placode shows a clear radial polarisation of cell behaviours, with isotropic  
21 constriction dominating near the pit (likely driven by the strong apical-medial  
22 actomyosin accumulation in these cells (Booth et al., 2014)), with cell intercalations  
23 dominating away from the pit, where junctional myosin is highly polarised.

24 **H** The temporal expression of molecular determinants leads to myosin polarisation at  
25 circumferential junctions, thereby polarising and driving T1 and rosette formation.  
26 Mechanical force generated through the pulling of the invaginating pit polarises the  
27 resolution of intercalation events. Both the tissue-wide polarisation of myosin II and  
28 the polarisation of resolution are lost in the absence of Fkh.

1 **Supplemental Movies**

2

3 ***Suppl. Movie 1. Example movie of early salivary gland placode morphogenesis***  
4 ***in 3D.***

5 Embryo of the genotype *Scribble-GFP/fkhGal4::UAS-palmYFP* as shown in Fig.1C  
6 and Fig.3A. Time stamp indicates time before and after initiation of tissue bending at  
7  $t=0$ . Scale bar 20 $\mu\text{m}$ .

8

9 ***Suppl. Movie 2. Example movies of Tissue strain rate tensor (SRT), Cell Shape***  
10 ***SRT and Intercalation SRT.***

11 Local strain rates are extracted from segmented and tracked movies. Tissue shape  
12 change (left), cell shape change (centre) and intercalation (right) are shown. Red  
13 vectors represent contraction and blue vectors represent expansion. Vectors are  
14 projected onto a radial coordinate system. Time stamp indicates time before and  
15 after initiation of tissue bending at  $t=0$ . See also Figure 2.

16

17 ***Suppl. Movie 3. Example of matching cells through depth.***

18 Apical cell identities matched to basal cell identities are shown within the placode.  
19 Stamp refers to the depth in the tissue. Scale bar 20 $\mu\text{m}$ . See also Figure 4.

20

21 ***Suppl. Movie 4. Example movie of apical rosette formation/resolution.***

22 Embryo of the genotype *sqh[AX3]; sqh::sqhGFP42 , UbiRFP-CAAX*, only the UbiRFP  
23 label is shown. A group of cells going through rosette formation/resolution is  
24 highlighted, stills of the movie are shown in Fig.5E. Time stamp indicates time before  
25 and after initiation of tissue bending at  $t=0$ . Scale bar 20 $\mu\text{m}$ .

26

27 ***Suppl. Movie 5. Example movie of cell shape and myosin II localisation in a***  
28 ***control embryo.***

1 Embryo of the genotype *sqh[AX3]; sqh::sqhGFP42 , UbiRFP-CAAX* used for the  
2 myosin II uni- and bi-polarity quantifications as shown in Fig.6. Time stamp indicates  
3 time before and after initiation of tissue bending at t=0. Scale bar 20µm.

4

5 ***Suppl. Movie 6. Example movie of automatic junctional myosin II quantification.***

6 Myosin II uni-polarity vectors (left) and bi-polarity vectors (right) are shown. Junctions  
7 are colour coded according to their myosin II intensity levels as shown if Fig. 6C'  
8 (middle). Time stamp indicates time before and after initiation of tissue bending at t=0.  
9 Scale bar 20µm. See also Figure 6.

10

11 ***Suppl. Movie 7. Example movie of cell shape and myosin II localisation in a***  
12 ***fkh[6] mutant embryo.***

13 Embryo of the genotype *sqh::sqhGFP42 , UbiRFP-CAAX; fkh[6]* used for the myosin  
14 II uni- and bi-polarity quantifications as shown in Fig.8. Time stamp indicates time  
15 before and after initiation of tissue bending at t=0. Scale bar 20µm.

16

17

## 1 **Materials and Methods**

2

### 3 ***Fly stocks and husbandry***

4 The following transgenic fly lines were used: *sqh<sup>AX3</sup>*; *sqh::sqhGFP42* (Royou et al.,  
5 2004) and *fkhGal4* (Henderson and Andrew, 2000; Zhou et al., 2001) [kind gift of  
6 Debbie Andrew]; *Scribble-GFP* (DGRC Kyoto), *UAS-palmYFP* (generated from  
7 membrane Brainbow; (Hampel et al., 2011)),  $y^1 w^* cv^1 sqh^{AX3}; P\{w^{mC}=sqh-$   
8  $GFP.RLC\}C-42 M\{w^{mC}=Ubi-TagRFP-T-CAAX\}ZH-22A$  (Kyoto DGRC Number  
9 109822, referred to as *sqh<sup>AX3</sup>*; *sqhGFP*; *UbiRFP*);  $P\{w+mC=sqh-GFP.RLC\}C-42$   
10  $M\{w+mC=Ubi-TagRFP-T-CAAX\}ZH-22A$ ; *fkh[6]/TM3 Sb Twi-Gal4::UAS-GFP* (*fkh[6]*  
11 allele from Bloomington). See Table 1 for details of genotypes used for individual  
12 figure panels.

13

### 14 ***Embryo Immunofluorescence Labelling, Confocal, and Time-lapse***

15 Embryos were collected on apple juice-agar plates and processed for  
16 immunofluorescence using standard procedures. Briefly, embryos were  
17 dechorionated in 50% bleach, fixed in 4% formaldehyde, and stained with phalloidin  
18 or primary and secondary antibodies in PBT (PBS plus 0.5% bovine serum albumin  
19 and 0.3% Triton X-100). anti-Crumbs and anti-E-Cadherin antibodies were obtained  
20 from the Developmental Studies Hybridoma Bank at the University of Iowa; anti-Baz  
21 was a gift from Andreas Wodarz (Wodarz et al., 1999); anti-Btk/Tec29 was a kindly  
22 provided by Georgia Tsikala (Tsikala et al., 2014); anti-Fkh was a gift from Herbert  
23 Jäckle (Weigel et al., 1989). Secondary antibodies used were Alexa Fluor 488/Fluor  
24 549/Fluor 649 coupled (Molecular Probes) and Cy3 and Cy5 coupled (Jackson  
25 ImmunoResearch Laboratories). Samples were embedded in Vectashield  
26 (Vectorlabs).

27 Images of fixed samples were acquired on an Olympus FluoView 1200 or a  
28 Zeiss 780 Confocal Laser scanning system as z-stacks to cover the whole apical

1 surface of cells in the placode. Z-stack projections were assembled in ImageJ or  
2 Imaris (Bitplane), 3D rendering was performed in Imaris.

3 For live time-lapse experiments embryos from [*Scribble-GFP,UAS-palmYFP*  
4 *fkhGal4*], [*sqh<sup>AX3</sup>; sqhGFP,UbiRFP*] or [*sqhGFP,UbiRFP; fkh[6]*] were dechorionated  
5 in 50% bleach and extensively rinsed in water. Embryos were manually aligned and  
6 attached to heptane-glyce coated coverslips and mounted on custom-made metal  
7 slides; embryos were covered using halocarbon oil 27 (Sigma) and viability after  
8 imaging after 24h was controlled prior to further data analysis. Time-lapse sequences  
9 were imaged under a 40x/1.3NA oil objective on an inverted Zeiss 780 Laser  
10 scanning system, acquiring z-stacks every 0.8-2.6 minutes with a typical voxel xyz  
11 size of 0.22 x 0.22 x 1  $\mu$ m. Z-stack projections to generate movies in Supplementary  
12 Material were assembled in ImageJ or Imaris. The absence of fluorescent *Tw*-  
13 *Gal4::UAS-GFP* was used to identify homozygous *fkh[6]* mutant embryos. During the  
14 early stages of salivary gland placode morphogenesis analysed here, *fkh[6]* mutants  
15 showed no reduction in cell number or initiation of apoptosis (data not shown). The  
16 membrane channel images from time-lapse experiments were denoised using *nd-*  
17 *safir* software (Boulanger et al., 2010).

18

### 19 **Cell segmentation and tracking**

20 Cell tracking was performed using custom software written in IDL (Blanchard et al.,  
21 2009; Booth et al., 2014). First, the curved surface of the embryonic epithelium was  
22 located by draping a 'blanket' down onto all image volumes over time, where the  
23 pixel-detailed blanket was caught by, and remained on top of binarised cortical  
24 fluorescence signal. Different quasi-2D image layers were then extracted from image  
25 volumes at specified depths from the surface blanket. We took image layers at 1-3  
26  $\mu$ m and 7-8  $\mu$ m for the apical and mid-basal depths, respectively. Image layers were  
27 local projections of 1-3 z-depths, with median, top-hat or high/low frequency filters  
28 applied as necessary to optimise subsequent cell tracking.

1           Cells in image layers at these two depths were segmented using an adaptive  
2 watershedding algorithm as they were simultaneously linked in time. Manual  
3 correction of segmented cell outlines was performed for all fixed and time-lapse data.  
4 Tracked cells were subjected to various quality filters (lineage length, area, aspect  
5 ratio, relative velocity) so that incorrectly tracked cells were eliminated prior to further  
6 analysis. The number of embryos analysed can be found in Table 1 (and see  
7 Supplementary Fig. 2 (WT apical), Supplementary Fig. 3 (WT basal) and  
8 Supplementary Fig. 7 (fkh)).

9

#### 10 ***Mobile radial coordinate system for the salivary placode***

11 WT movies were aligned in time using as t=0 mins the frame just before the first sign  
12 of invagination of cell apices at the future tube pit was evident. *fkh[6]* mutants were  
13 aligned using as a reference of embryo development the level of invagination of the  
14 tracheal pits that are not affected in the *fkh[6]* mutant as well as other morphological  
15 markers such as appearance and depth of segmental grooves in the embryo. Cells  
16 belonging to the salivary placode (without the future duct cells that comprise the two  
17 most ventral rows of cells in the primordium) were then manually outlined at t=0 mins  
18 using the surrounding myosin II cable as a guide and ramified forwards and  
19 backwards in time. Only cells of the salivary placode were included in subsequent  
20 analyses.

21           At t=0 mins, the centre of the future tube pit was specified manually as the  
22 origin of a radial coordinate system, with radial distance (in  $\mu\text{m}$ ) increasing away from  
23 the pit (e.g. Fig. 1G). Circumferential angle was set to zero towards Posterior,  
24 proceeding anti-clockwise for the placode on the left-hand side of the embryo, and  
25 clockwise for the placode on the right so that data collected from different sides could  
26 be overlaid.



1           The radial coordinate system was ‘mobile’, in the sense that its origin tracked  
2 the centre of the pit, forwards and backwards in time, as the placode translated within  
3 the field of view due to embryo movement or to on-going morphogenesis.

4

#### 5 ***Morphogenetic strain rate analysis***

6 Detailed spatial patterns of the rates of deformation across the placode and over time  
7 quantify the outcome of active stresses, viscoelastic material properties and frictions  
8 both from within and outside the placode. We quantified strain (deformation) rates  
9 over small spatio-temporal domains composed of a focal cell and one corona of  
10 immediate neighbours over a ~5 min interval ((Blanchard et al., 2009) and reviewed  
11 in (Blanchard, 2017)). On such 2D domains, strain rates are captured elliptically, as  
12 the strain rate in the orientation of greatest absolute strain rate, with a second strain  
13 rate perpendicular to this (Fig. 2B).

14           For the early morphogenesis of the salivary gland placode, in which there is  
15 no cell division or gain/loss of cells from the epithelium, three types of strain rate can  
16 be calculated. First, total tissue strain rates are calculated for all local domains using  
17 the relative movements of cell centroids, extracted from automated cell tracking. This  
18 captures the net effect of cell shape changes and cell rearrangements within the  
19 tissue, but these can also be separated out. Second, domain cell shape strain rates  
20 are calculated by approximating each cell with its best-fit ellipse and then finding the  
21 best mapping of a cell’s elliptical shape to its shape in the subsequent time point, and  
22 averaging over the cells of the domain. Third, intercalation strain rates that capture  
23 the continuous process of cells in a domain sliding past each other in a particular  
24 orientation, is calculated as the difference between the total tissue strain rates and  
25 the cell shape strain rates of cells. Strain rates were calculated using custom  
26 software written in IDL (code provided in (Blanchard et al., 2009) or by email from  
27 G.B.B.).

1           The three types of elliptical strain rate were projected onto our radial  
2 coordinate system (see Fig. 1F), so that we could analyse radial and circumferential  
3 contributions. Strain rates in units of proportional size change per minute can easily  
4 be averaged across space or accumulated over time. We present instantaneous  
5 strain rates over time for spatial subsets of cells in the placode, and cumulative strain  
6 rates for the same regions over time. These plots were made from exported data  
7 using MATLAB R2014b.

8           We calculated strain rates in layers at two depths for WT placodes. Because  
9 we applied a radial coordinate system originating in the centre of the future tube pit to  
10 both depths, and used the same reference  $t=0$  mins, we were able to compare strain  
11 rates at the same spatio-temporal locations on the placode between the depths.

12

### 13 ***Matching cells between apical and mid-basal layers***

14 We also wanted to characterize the 3D geometries of cells within small domains,  
15 using the cell shapes and arrangements in the two depths we had tracked. To do  
16 this, we needed to correctly match cells between apical and mid-basal depths. We  
17 manually seeded 3-5 apico-basal cell matches per placode, then used an automated  
18 method to fill out the remaining cell matches across the placode and over time.

19           We did this by sequentially looking at all unmatched apical cells that were  
20 next to one or more matched cell. The location of the unmatched basal centroid was  
21 predicted by adding the vector between matched and unmatched apical cell centroids  
22 to the matched basal centroid. The nearest actual basal centroid to this predicted  
23 basal centroid location was chosen as the match, on condition that the prediction  
24 accuracy was within 0.25 of the apical centroid distance. Information from multiple  
25 matched neighbours was used, if available, improving the basal centroid prediction.  
26 Progressively matching cells out from known matched cells filled out placodes for all  
27 embryos. We visually checked apical-basal matches for each embryo in movies of an

1 overlay of apical and basal cell shapes with apico-basal centroid connections drawn  
2 (Suppl. Movie 3).

3

#### 4 ***z-strain rates: 3D domain geometries***

5 Having matched cells between apical and mid-basal layers, we have access to  
6 information about approximate 3D cell shapes. For single cells we can measure how  
7 wedged the cell shape is in any orientation and how tilted is the apical centroid to  
8 basal centroid 'in-line' relative to the surface normal (Suppl. Fig. 4A). In particular, we  
9 are interested in the amount of wedging and tilt in our radial and circumferential  
10 placode orientations (Fig. 4A). However, an important aspect is missing which is that  
11 cells can be arranged differently apically versus basally, that is they can be to a  
12 greater or less extent interleaved. The degree of interleaving is a multi-cell  
13 phenomenon, so we return to our small domains of a cell and its immediate  
14 neighbours. Within these small domains we want to quantify the amount of cell  
15 wedging, interleaving and cell tilt.

16 To correctly separate these quantities, we borrow from methods developed to  
17 separate out the additive contributions of wedging, interleaving and tilt that account  
18 for epithelial curvature (Deacon, 2012). Deacon shows that for small domains of  
19 epithelial cells, curvature across the domain is the sum of their wedging and  
20 interleaving, while cell tilt has no direct implication for curvature.

21 During our study period, salivary placodes have minimal curvature. We  
22 therefore simplify the problem to flat (uncurved) domains, uncurving any local  
23 curvature so that apical and basal cell outlines are flat and parallel. Usefully, we can  
24 then treat small domains in exactly the same way as we have done above to  
25 calculate strain rates, but instead of quantifying the rate of deformation over time,  
26 here we calculate rate of deformation in depth, or 'z-strain rates'.

27 The cell shape strain rate is equivalent to the wedging z-strain rate (Fig. 4B)  
28 and the intercalation strain rate is the interleaving z-strain rate (Fig. 4D). Both of

1 these add up to a total strain rate and a total z-strain rate (Suppl. Fig. 4C),  
2 respectively. Note that the total z-strain rate of a domain can be the result exclusively  
3 of wedging or of interleaving (as in Fig. 4B,D; as with temporal strain rates, Fig. 2A),  
4 but some combination of the two is more likely. Domain translation and rotation for  
5 temporal domains become domain tilt (Fig. 4F) and torsion in the 3D domain  
6 geometries, respectively. Domain torsion is very weak in spatial or temporal  
7 averages of the placode (data not shown).

8         The units of wedging and interleaving are proportional size change per  $\mu\text{m}$  in  
9 z, and tilt is simply a rate ( $xy \mu\text{m} / z \mu\text{m}$ ). We use the convention that change is from  
10 basal to apical, so a bottle-shape would be negative cell wedging. The number of  
11 embryos analysed for 3D cell geometries can be found in Table 2.

12

### 13 ***Fluorescence intensity quantifications of Myosin and Bazooka***

14 Embryos of the genotype *sqhAX3; sqh::sqhGFP42* (Royou et al., 2004) were labelled  
15 with either with anti-Bazooka and anti-DE-Cadherin or anti-DE-Cadherin and  
16 phalloidin to highlight cell membranes. For Fig. 5B, myosin II signal intensity of  
17 junctions oriented either circumferentially or radially from 5 placodes was quantified  
18 using Image J. For Fig. 5I fluoresce intensity of myosin II and Bazooka of junctions  
19 such as the ones indicated by arrows in Fig. 5H', that were oriented either  
20 circumferentially or radially from 10 placodes was quantified using Image J. 3-pi wide  
21 lines were manually drawn along each junction. Intensity values were normalized to  
22 average fluorescence outside the placodes. We used a paired t-test for comparison  
23 of intensities within in the same junction, unpaired t-tests for comparison of  
24 circumferential myosin II vs radial myosin II and circumferential Baz vs radial Baz.

25

26

### 27 ***Automated Myosin II quantification and polarity***

28 Whereas previously we quantified apicomedial Myosin II (Booth et al., 2014), here we

1 focused on junctional Myosin II. We extracted a quasi-2D layer image from the  
2 Myosin II channel at a depth that maximised the capture of the junctional Myosin. We  
3 background-subtracted the Myosin images and quantified the average intensity of  
4 Myosin along each cell-cell interface within the placode. To calculate the average  
5 intensity, we set the width of cell-cell interfaces as the cell edge pixels plus 2 pixels in  
6 a perpendicular direction either side. This captured the variable width of Myosin  
7 signal at interfaces.

8 We further summarised the uni- and bipolarity of Myosin for each cell.  
9 Methods to calculate Myosin II unipolarity and bipolarity are described in detail in  
10 (Tetley et al., 2016). Briefly, the average interface fluorescence intensity around each  
11 cell perimeter as a function of angle is treated as a periodic signal and decomposed  
12 using Fourier analysis. The amplitude component of period 2 corresponds to the  
13 strength of Myosin II bipolarity (equivalent to planar cell polarity) (Fig. 6D'). Similarly,  
14 the amplitude of period 1 is attributed to myosin unipolarity (junctional enrichment in  
15 a particular interface) (Fig. 6D"). The extracted phase of period 1 and 2 (bi/uni-  
16 polarity) represent the orientation of cell polarity. We projected both polarities onto  
17 our radial coordinate system. Both polarity amplitudes are expressed as a proportion  
18 of the mean cell perimeter fluorescence. Cells at the border of the placode  
19 neighbouring the supra-cellular actomyosin cable were excluded from the analysis.  
20 The number of embryos analysed can be found in Table 2.

21

## 22 ***Neighbour exchange analysis***

23 We used changes in neighbour connectivity in our tracked cell data to identify  
24 neighbour exchange events (T1 processes). Neighbour exchange events were  
25 defined by the identity of the pair of cells that lost connectivity in  $t$  and the pair that  
26 gained connectivity at  $t+1$ . The orientation of gain we defined as the orientation of the  
27 centroid-centroid line of the gaining pair at  $t+1$ . We further classified gains as either  
28 radially or circumferentially oriented, depending on which the gain axis was most

1 closely aligned to locally. We did not distinguish between solitary T1s and T1s  
2 involved in rosette-like structures.

3 From visual inspection, we knew that some T1s were subsequently reversed,  
4 so we characterised not only the total number of gains in each orientation but also  
5 the net gain in the circumferential axis, by subtracting the number of radial gains.  
6 Furthermore, when comparing embryos and genotypes, we controlled for differences  
7 in numbers of tracked cells by expressing the net circumferential gain per time step  
8 as a proportion of half of the total number of tracked cell-cell interfaces in that time  
9 step. We accumulated numbers of gains, net gains, and proportional rate of gain over  
10 time for WT (Fig. 5C) and *fkh* (Fig. 8E,F) embryos. Two sample Kolmogorov-Smirnov  
11 test was used to determine significance at  $p < 0.05$  for data in Fig. 8F.

12

### 13 ***Statistical analysis of time-lapse data***

14 Statistical tests to determine significance of data shown are indicated in the figure  
15 legends. Significance in time-lapse movies was calculated for bins of 4.5 minutes  
16 using a mixed-effects model implemented in R ('lmer4' package as in (Butler et al.,  
17 2009; Lye et al., 2015)) using variation between embryos as random effects and a  
18 significance threshold of  $p < 0.05$ .

19 Error bars in time-lapse plots show an indicative confidence interval of the mean,  
20 calculated as the mean of within-embryo variances. The between-embryo variation is  
21 not depicted, even though both are accounted for in the mixed effects tests.

22

23

1 **Acknowledgements**

2 The authors would like to thank the following people; for reagents and fly stocks:

3 Debbie Andrew, Andreas Wodarz, Georgia Tsikala, Herbert Jäckle; for help with

4 image analysis: Jérôme Boulanger.

5 Work in the Röper lab is supported by the Medical Research Council (file reference

6 number U105178780). GBB was supported by grant no. 15.23(k) from the Isaac

7 Newton Trust, by Wellcome Trust grant no. 100329/Z/12/Z awarded to William Harris

8 and Biotechnology and Biological Sciences Research Council Standard Grant

9 BB/J010278/1 to Richard Adams and Bénédicte Sanson.

10

1 **Table 1. Genotypes used for Figure Panels.**

| Figure | Panel                   | Embryo genotype                                                                  | Number of embryos used for quantitative analysis |       |
|--------|-------------------------|----------------------------------------------------------------------------------|--------------------------------------------------|-------|
| 1      | B, B'                   | <i>Scribble-GFP</i>                                                              | panel representative of genotype                 | fixed |
| 1      | C                       | <i>fkhGal4,UASpalm-YFP/Scribble-GFP</i>                                          | panel representative of genotype                 | live  |
| 1      | G,H                     | <i>fkhGal4,UASpalm-YFP/Scribble-GFP and sqh[AX3]; sqh::sqhGFP42, UbiRFP-CAAX</i> | 1 and 8                                          | live  |
| 2      | C,D,E                   | <i>fkhGal4,UASpalm-YFP/Scribble-GFP and sqh[AX3]; sqh::sqhGFP42, UbiRFP</i>      | 1 and 8                                          | live  |
| 3      | A,B                     | <i>fkhGal4,UASpalm-YFP/Scribble-GFP</i>                                          | panels representative of genotype                | live  |
| 3      | D,E,F                   | <i>sqh[AX3]; sqh::sqhGFP42, UbiRFP-CAAX</i>                                      | 5                                                | live  |
| 4      | C,E,G                   | <i>fkhGal4,UASpalm-YFP/Scribble-GFP and sqh[AX3]; sqh::sqhGFP42, UbiRFP-CAAX</i> | 1 and 4                                          | live  |
| 5      | C',C'', C'''            | <i>fkhGal4,UASpalm-YFP/Scribble-GFP and sqh[AX3]; sqh::sqhGFP42, UbiRFP</i>      | 1 and 6                                          | live  |
| 5      | D,D'                    | <i>sqh[AX3]; sqh::sqhGFP42, UbiRFP-CAAX</i>                                      | 3                                                | live  |
| 5      | E,F,G                   | <i>sqh[AX3];sqh::sqhGFP42, UbiRFP-CAAX</i>                                       | panels representative of genotype                | live  |
| 6      | A                       | <i>sqh[AX3]; sqh::sqhGFP42</i>                                                   | panel representative of genotype                 | fixed |
| 6      | B                       | <i>sqh[AX3]; sqh::sqhGFP42</i>                                                   | 5                                                | fixed |
| 6      | C                       | <i>sqh[AX3]; sqh::sqhGFP42 UbiRFP-CAAX</i>                                       | panels representative of genotype                | live  |
| 6      | E,F                     | <i>sqh[AX3]; sqh::sqhGFP42, UbiRFP-CAAX</i>                                      | 4                                                | live  |
| 6      | G                       | <i>sqh[AX3]; sqh::sqhGFP42</i>                                                   | panels representative of genotype                | fixed |
| 6      | H                       | <i>sqh[AX3]; sqh::sqhGFP42</i>                                                   | panels representative of genotype                | fixed |
| 6      | I                       | <i>sqh[AX3]; sqh::sqhGFP42</i>                                                   | 5                                                | fixed |
| 7      | A                       | <i>sqh::sqhGFP42, UbiRFP-CAAX; fkh[6]</i>                                        | panels representative of genotype                | fixed |
| 7      | B                       | <i>sqh::sqhGFP42, UbiRFP-CAAX; fkh[6]/TM3</i>                                    | panels representative of genotype                | fixed |
| 7      | C                       | <i>sqh[AX3]; sqh::sqhGFP42, UbiRFP-CAAX</i>                                      | panels representative of genotype                | live  |
| 7      | D                       | <i>sqh::sqhGFP42, UbiRFP-CAAX; fkh[6]</i>                                        | panels representative of genotype                | live  |
| 7      | E,F (as in Fig.2 C,D,E) | <i>fkhGal4,UASpalm-YFP/Scribble-GFP and sqh[AX3]; sqh::sqhGFP42, UbiRFP-CAAX</i> | 1 and 8                                          | live  |
| 7      | E,F                     | <i>sqh::sqhGFP42, UbiRFP; fkh[6]</i>                                             | 5                                                | live  |
| 8      | A,B                     | <i>sqh[AX3]; sqh::sqhGFP42, UbiRFP-CAAX</i>                                      | 4                                                | live  |
| 8      | A,B                     | <i>sqh::sqhGFP42, UbiRFP-CAAX; fkh[6]</i>                                        | 5                                                | live  |
| 8      | C,D                     | <i>sqh::sqhGFP42, UbiRFP-CAAX; fkh[6]</i>                                        | 3                                                | live  |



|   |   |                                                                                 |         |      |
|---|---|---------------------------------------------------------------------------------|---------|------|
| 8 | E | <i>sqh[AX3];sqh::sqhGFP42 ,UbiRFP-CAAX</i>                                      | 6       | live |
| 8 | E | <i>sqh::sqhGFP42 ,UbiRFP-CAAX; fkh[6]</i>                                       | 5       | live |
| 8 | F | <i>fkhGal4,UASpalm-YFP/Scribble-GFP and<br/>sqh[AX3]; sqh::sqhGFP42 ,UbiRFP</i> | 1 and 6 | live |
| 8 | F | <i>sqh::sqhGFP42 ,UbiRFP-CAAX; fkh[6]</i>                                       | 5       | live |

1

1 **References**

2

3 Blanchard, G.B. 2017. Taking the strain: quantifying the contributions of all cell  
4 behaviours to changes in epithelial shape. *Philosophical transactions of the*  
5 *Royal Society of London. Series B, Biological sciences.* 372.

6 Blanchard, G.B., A.J. Kabla, N.L. Schultz, L.C. Butler, B. Sanson, N. Gorfinkiel, L.  
7 Mahadevan, and R.J. Adams. 2009. Tissue tectonics: morphogenetic strain  
8 rates, cell shape change and intercalation. *Nat Methods.* 6:458-464.

9 Blanchard, G.B., S. Murugesu, R.J. Adams, A. Martinez-Arias, and N. Gorfinkiel.  
10 2010. Cytoskeletal dynamics and supracellular organisation of cell shape  
11 fluctuations during dorsal closure. *Development.* 137:2743-2752.

12 Blankenship, J.T., S.T. Backovic, J.S. Sanny, O. Weitz, and J.A. Zallen. 2006.  
13 Multicellular rosette formation links planar cell polarity to tissue  
14 morphogenesis. *Dev Cell.* 11:459-470.

15 Booth, A.J., G.B. Blanchard, R.J. Adams, and K. Röper. 2014. A dynamic  
16 microtubule cytoskeleton directs medial actomyosin function during tube  
17 formation. *Dev Cell.* 29:562-576.

18 Bosveld, F., I. Bonnet, B. Guirao, S. Tlili, Z. Wang, A. Petitalot, R. Marchand, P.L.  
19 Bardet, P. Marcq, F. Graner, and Y. Bellaiche. 2012. Mechanical control of  
20 morphogenesis by Fat/Dachsous/Four-jointed planar cell polarity pathway.  
21 *Science.* 336:724-727.

22 Boulanger, J., C. Kervrann, P. Bouthemy, P. Elbau, J.B. Sibarita, and J. Salamero.  
23 2010. Patch-based nonlocal functional for denoising fluorescence microscopy  
24 image sequences. *IEEE Trans Med Imaging.* 29:442-454.

25 Butler, L.C., G.B. Blanchard, A.J. Kabla, N.J. Lawrence, D.P. Welchman, L.  
26 Mahadevan, R.J. Adams, and B. Sanson. 2009. Cell shape changes indicate  
27 a role for extrinsic tensile forces in *Drosophila* germ-band extension. *Nat Cell*  
28 *Biol.* 11:859-864.

- 1 Chandrasekaran, V., and S.K. Beckendorf. 2005. Tec29 controls actin remodeling  
2 and endoreplication during invagination of the *Drosophila* embryonic salivary  
3 glands. *Development*. 132:3515-3524.
- 4 Chanet, S., C.J. Miller, E.D. Vaishnav, B. Ermentrout, L.A. Davidson, and A.C. Martin.  
5 2017. Actomyosin meshwork mechanosensing enables tissue shape to orient  
6 cell force. *Nature communications*. 8:15014.
- 7 Chung, S., S. Kim, and D.J. Andrew. 2017. Uncoupling apical constriction from tissue  
8 invagination. *eLife*. 6: e22235  
9 .
- 10 Claret, S., J. Jouette, B. Benoit, K. Legent, and A. Guichet. 2014. PI(4,5)P2 produced  
11 by the PI4P5K SKTL controls apical size by tethering PAR-3 in *Drosophila*  
12 epithelial cells. *Curr Biol*. 24:1071-1079.
- 13 Collinet, C., M. Rauzi, P.F. Lenne, and T. Lecuit. 2015. Local and tissue-scale forces  
14 drive oriented junction growth during tissue extension. *Nat Cell Biol*. 17:1247-  
15 1258.
- 16 Deacon, W. 2012. Quantification of cell and tissue behaviours during morphogenesis.  
17 *In* Department of Physiology, Development and Neuroscience. University of  
18 Cambridge, Cambridge.
- 19 Eournay, R., M. Popovic, M. Merkel, A. Nandi, C. Blasse, B. Aigouy, H. Brandl, G.  
20 Myers, G. Salbreux, F. Julicher, and S. Eaton. 2015. Interplay of cell  
21 dynamics and epithelial tension during morphogenesis of the *Drosophila*  
22 pupal wing. *eLife*. 4:e07090.
- 23 Fernandez-Gonzalez, R., M. Simoes Sde, J.C. Roper, S. Eaton, and J.A. Zallen.  
24 2009. Myosin II dynamics are regulated by tension in intercalating cells. *Dev*  
25 *Cell*. 17:736-743.
- 26 Girdler, G.C., and K. Röper. 2014. Controlling cell shape changes during salivary  
27 gland tube formation in *Drosophila*. *Semin Cell Dev Biol*. 31:74-81.

- 1 Guirao, B., S.U. Rigaud, F. Bosveld, A. Bailles, J. Lopez-Gay, S. Ishihara, K.  
2 Sugimura, F. Graner, and Y. Bellaiche. 2015. Unified quantitative  
3 characterization of epithelial tissue development. *eLife*. 4.  
4 Hampel, S., P. Chung, C.E. McKellar, D. Hall, L.L. Looger, and J.H. Simpson. 2011.  
5 *Drosophila* Brainbow: a recombinase-based fluorescence labeling technique  
6 to subdivide neural expression patterns. *Nat Methods*. 8:253-259.  
7 Henderson, K.D., and D.J. Andrew. 2000. Regulation and function of Scr, exd, and  
8 hth in the *Drosophila* salivary gland. *Dev Biol*. 217:362-374.  
9 Jurgens, G., and D. Weigel. 1988. Terminal versus segmental development in the  
10 *Drosophila* embryo: the role of the homeotic gene fork head. *Roux Arch Dev*  
11 *Biol*. 197:345-354.  
12 Kerridge, S., A. Munjal, J.M. Philippe, A. Jha, A.G. de las Bayonas, A.J. Saurin, and  
13 T. Lecuit. 2016. Modular activation of Rho1 by GPCR signalling imparts  
14 polarized myosin II activation during morphogenesis. *Nat Cell Biol*. 18:261-  
15 270.  
16 Kolesnikov, T., and S.K. Beckendorf. 2007. 18 wheeler regulates apical constriction  
17 of salivary gland cells via the Rho-GTPase-signaling pathway. *Dev Biol*.  
18 307:53-61.  
19 Lee, J.Y., and R.M. Harland. 2007. Actomyosin contractility and microtubules drive  
20 apical constriction in *Xenopus* bottle cells. *Dev Biol*. 311:40-52.  
21 Levayer, R., and T. Lecuit. 2012. Biomechanical regulation of contractility: spatial  
22 control and dynamics. *Trends Cell Biol*. 22:61-81.  
23 Lienkamp, S.S., K. Liu, C.M. Karner, T.J. Carroll, O. Ronneberger, J.B. Wallingford,  
24 and G. Walz. 2012. Vertebrate kidney tubules elongate using a planar cell  
25 polarity-dependent, rosette-based mechanism of convergent extension. *Nat*  
26 *Genet*. 44:1382-1387.

- 1 Lye, C.M., G.B. Blanchard, H.W. Naylor, L. Muresan, J. Huisken, R.J. Adams, and B.  
2 Sanson. 2015. Mechanical Coupling between Endoderm Invagination and  
3 Axis Extension in *Drosophila*. *PLoS biology*. 13:e1002292.
- 4 Manning, A.J., K.A. Peters, M. Peifer, and S.L. Rogers. 2013. Regulation of epithelial  
5 morphogenesis by the G protein-coupled receptor mist and its ligand fog. *Sci*  
6 *Signal*. 6:ra98.
- 7 Martin, A.C., and B. Goldstein. 2014. Apical constriction: themes and variations on a  
8 cellular mechanism driving morphogenesis. *Development*. 141:1987-1998.
- 9 Martin, A.C., M. Kaschube, and E.F. Wieschaus. 2009. Pulsed contractions of an  
10 actin-myosin network drive apical constriction. *Nature*. 457:495-499.
- 11 Mason, F.M., M. Tworoger, and A.C. Martin. 2013. Apical domain polarization  
12 localizes actin-myosin activity to drive ratchet-like apical constriction. *Nat Cell*  
13 *Biol*. 15:926-936.
- 14 Monier, B., M. Gettings, G. Gay, T. Mangeat, S. Schott, A. Guarner, and M. Suzanne.  
15 2015. Apico-basal forces exerted by apoptotic cells drive epithelium folding.  
16 *Nature*. 518:245-248.
- 17 Munjal, A., and T. Lecuit. 2014. Actomyosin networks and tissue morphogenesis.  
18 *Development*. 141:1789-1793.
- 19 Myat, M.M., and D.J. Andrew. 2000a. Fork head prevents apoptosis and promotes  
20 cell shape change during formation of the *Drosophila* salivary glands.  
21 *Development*. 127:4217-4226.
- 22 Myat, M.M., and D.J. Andrew. 2000b. Organ shape in the *Drosophila* salivary gland is  
23 controlled by regulated, sequential internalization of the primordia.  
24 *Development*. 127:679-691.
- 25 Myat, M.M., and D.J. Andrew. 2002. Epithelial tube morphology is determined by the  
26 polarized growth and delivery of apical membrane. *Cell*. 111:879-891.

- 1 Panzer, S., D. Weigel, and S.K. Beckendorf. 1992. Organogenesis in *Drosophila*  
2 melanogaster: embryonic salivary gland determination is controlled by  
3 homeotic and dorsoventral patterning genes. *Development*. 114:49-57.
- 4 Pare, A.C., A. Vichas, C.T. Fincher, Z. Mirman, D.L. Farrell, A. Mainieri, and J.A.  
5 Zallen. 2014. A positional Toll receptor code directs convergent extension in  
6 *Drosophila*. *Nature*. 515:523-527.
- 7 Plageman, T.F., Jr., B.K. Chauhan, C. Yang, F. Jaudon, X. Shang, Y. Zheng, M. Lou,  
8 A. Debant, J.D. Hildebrand, and R.A. Lang. 2011. A Trio-RhoA-Shroom3  
9 pathway is required for apical constriction and epithelial invagination.  
10 *Development*. 138:5177-5188.
- 11 Rauzi, M., P.F. Lenne, and T. Lecuit. 2010. Planar polarized actomyosin contractile  
12 flows control epithelial junction remodelling. *Nature*. 468:1110-1114.
- 13 Röper, K. 2012. Anisotropy of Crumbs and aPKC Drives Myosin Cable Assembly  
14 during Tube Formation. *Dev Cell*. 23:939-953.
- 15 Röper, K. 2013. Supracellular actomyosin assemblies during development.  
16 *Bioarchitecture*. 3:45-49.
- 17 Röper, K. 2015. Integration of cell-cell adhesion and contractile actomyosin activity  
18 during morphogenesis. *Curr Top Dev Biol*. 112:103-127.
- 19 Royou, A., C. Field, J.C. Sisson, W. Sullivan, and R. Karess. 2004. Reassessing the  
20 role and dynamics of nonmuscle myosin II during furrow formation in early  
21 *Drosophila* embryos. *Mol Biol Cell*. 15:838-850.
- 22 Sidor, C., and K. Röper. 2016. Genetic Control of Salivary Gland Tubulogenesis in  
23 *Drosophila*. In *Organogenetic Gene Networks*. J. Castelli-Gair Hombria and  
24 P. Bovolenta, editors. Springer International Publishing, Switzerland. 125-149.
- 25 Simoes, S., B. Denholm, D. Azevedo, S. Sotillos, P. Martin, H. Skaer, J.C. Hombria,  
26 and A. Jacinto. 2006. Compartmentalisation of Rho regulators directs cell  
27 invagination during tissue morphogenesis. *Development*. 133:4257-4267.

- 1 Simoes Sde, M., J.T. Blankenship, O. Weitz, D.L. Farrell, M. Tamada, R. Fernandez-  
2 Gonzalez, and J.A. Zallen. 2010. Rho-kinase directs Bazooka/Par-3 planar  
3 polarity during *Drosophila* axis elongation. *Dev Cell*. 19:377-388.
- 4 Sun, Z., C. Amourda, M. Shagirov, Y. Hara, T.E. Saunders, and Y. Toyama. 2017.  
5 Basolateral protrusion and apical contraction cooperatively drive *Drosophila*  
6 germ-band extension. *Nat Cell Biol*. 19:375-383.
- 7 Tetley, R.J., G.B. Blanchard, A.G. Fletcher, R.J. Adams, and B. Sanson. 2016.  
8 Unipolar distributions of junctional Myosin II identify cell stripe boundaries that  
9 drive cell intercalation throughout *Drosophila* axis extension. *eLife*. 5.
- 10 Thompson, B.J., F. Pichaud, and K. Röper. 2013. Sticking together the Crumbs - an  
11 unexpected function for an old friend. *Nat Rev Mol Cell Biol*. 14:307-314.
- 12 Tsikala, G., D. Karagogeos, and M. Strigini. 2014. Btk-dependent epithelial cell  
13 rearrangements contribute to the invagination of nearby tubular structures in  
14 the posterior spiracles of *Drosophila*. *Dev Biol*. 396:42-56.
- 15 Weigel, D., H.J. Bellen, G. Jurgens, and H. Jackle. 1989. Primordium specific  
16 requirement of the homeotic gene fork head in the developing gut of the  
17 *Drosophila* embryo. *Roux Arch Dev Biol*. 198:201-210.
- 18 Wen, F.L., Y.C. Wang, and T. Shibata. 2017. Epithelial Folding Driven by Apical or  
19 Basal-Lateral Modulation: Geometric Features, Mechanical Inference, and  
20 Boundary Effects. *Biophys J*. 112:2683-2695.
- 21 Wodarz, A., A. Ramrath, U. Kuchinke, and E. Knust. 1999. Bazooka provides an  
22 apical cue for Inscuteable localization in *Drosophila* neuroblasts. *Nature*.  
23 402:544-547.
- 24 Zhou, B., A. Bagri, and S.K. Beckendorf. 2001. Salivary gland determination in  
25 *Drosophila*: a salivary-specific, fork head enhancer integrates spatial pattern  
26 and allows fork head autoregulation. *Dev Biol*. 237:54-67.
- 27
